# Supplementary material for: Early transcriptional response in the jejunum of germ-free piglets after oral infection with virulent rotavirus
Source: Springer Nature journal article supplement (doi:10.1007/s00705-008-0118-6), 2008-06-03
Supplement: MOESM1 [file 8646138]

| no.                                                                                                                                                            | plate ID       | datebase                 | Blast_type | Genbank or TC acc.                      | Hit                                                              |
|----------------------------------------------------------------------------------------------------------------------------------------------------------------|----------------|--------------------------|------------|-----------------------------------------|------------------------------------------------------------------|
|                                                                                                                                                                |                |                          |            |                                         |                                                                  |
| <b>Legend; Annotation ESTs spotted on the Porcine intestinal cDNA array.</b>                                                                                   |                |                          |            |                                         |                                                                  |
| EST inserts of PIG Jejunum library clones (plate ID) were sequenced and sequences were annotated by BLASTN or BLASTX analysis against the indicates databases. |                |                          |            |                                         |                                                                  |
| Accession numbers of the hit with the highest degree of homology (DFCI Gene Index TC numbers or Genbank acc. numbers) are provided.                            |                |                          |            |                                         |                                                                  |
| 1                                                                                                                                                              | pl 0 A01 darms | AllGenBank+EMBL+DDBJ+PDB | BLASTN     | <a href="#">ref NM_214185.1 </a>        | SusScrofa microsomal triglyceride transfe...                     |
| 2                                                                                                                                                              | pl 0 A03 darms | AllGenBank+EMBL+DDBJ+PDB | BLASTN     | <a href="#">ref NM_000134.2 </a>        | Homosapiens fatty acid binding protein 2,...                     |
| 3                                                                                                                                                              | pl 0 A04 darms | AllGenBank+EMBL+DDBJ+PDB | BLASTN     | <a href="#">gb M93028.1 PIGMHCIIDD</a>  | PigMHC class II (SLA-DR-alpha) mRNA...                           |
| 4                                                                                                                                                              | pl 0 A08 darms | AllGenBank+EMBL+DDBJ+PDB | BLASTN     | <a href="#">gb AY180903.1 </a>          | SusScrofa peptide transporter 1 mRNA, compl...                   |
| 5                                                                                                                                                              | pl 0 A10 darms | AllGenBank+EMBL+DDBJ+PDB | BLASTN     | <a href="#">gb AY358671.1 </a>          | Homosapiens clone DNA58855 TCCE518 (UNQ518)...                   |
| 6                                                                                                                                                              | pl 0 A11 darms | AllGenBank+EMBL+DDBJ+PDB | BLASTN     | <a href="#">emb AL049780.4 CNS00007</a> | Humanchromosome 14 DNA sequence BA...                            |
| 7                                                                                                                                                              | pl 0 B02 darms | AllGenBank+EMBL+DDBJ+PDB | BLASTN     | <a href="#">ref NM_002153.1 </a>        | Homosapiens hydroxysteroid (17-beta) dehy...                     |
| 8                                                                                                                                                              | pl 0 B03 darms | AllGenBank+EMBL+DDBJ+PDB | BLASTN     | <a href="#">ref NM_000134.2 </a>        | Homosapiens fatty acid binding protein 2,...                     |
| 9                                                                                                                                                              | pl 0 B04 darms | AllGenBank+EMBL+DDBJ+PDB | BLASTN     | <a href="#">gb AC093561.2 </a>          | Homosapiens chromosome 1 clone RP11-401A10,...                   |
| 10                                                                                                                                                             | pl 0 B06 darms | AllGenBank+EMBL+DDBJ+PDB | BLASTN     | <a href="#">gb L13068.1 PIGCABIPRO</a>  | SusScrofa calbindin D-9k mRNA, comp...                           |
| 11                                                                                                                                                             | pl 0 B07 darms | AllGenBank+EMBL+DDBJ+PDB | BLASTN     | <a href="#">ref NM_000035.2 </a>        | Homosapiens aldolase B, fructose-bisphosp...                     |
| 12                                                                                                                                                             | pl 0 B09 darms | AllGenBank+EMBL+DDBJ+PDB | BLASTN     | <a href="#">NM_001082462</a>            | Bos taurus similar to phospholipase inhibitor (MGC148293), mRNA. |
| 13                                                                                                                                                             | pl 0 B10 darms | AllGenBank+EMBL+DDBJ+PDB | BLASTN     | <a href="#">gb L13068.1 PIGCABIPRO</a>  | SusScrofa calbindin D-9k mRNA, comp...                           |
| 14                                                                                                                                                             | pl 0 B11 darms | AllGenBank+EMBL+DDBJ+PDB | BLASTN     | <a href="#">dbj D78130.1 </a>           | Homosapiens mRNA for squalene epoxidase, com...                  |
| 15                                                                                                                                                             | pl 0 B12 darms | AllGenBank+EMBL+DDBJ+PDB | BLASTN     | <a href="#">gb M16972.1 PIGAAOA</a>     | PorcineD-amino acid oxidase mRNA, comp...                        |
| 16                                                                                                                                                             | pl 0 C01 darms | AllGenBank+EMBL+DDBJ+PDB | BLASTN     | <a href="#">ref NM_214185.1 </a>        | SusScrofa microsomal triglyceride transfe...                     |
| 17                                                                                                                                                             | pl 0 C04 darms | AllGenBank+EMBL+DDBJ+PDB | BLASTN     | <a href="#">ref NM_213850.1 </a>        | SusScrofa glutathione S-transferase (LOC3...                     |
| 18                                                                                                                                                             | pl 0 C05 darms | AllGenBank+EMBL+DDBJ+PDB | BLASTN     | <a href="#">ref NM_000134.2 </a>        | Homosapiens fatty acid binding protein 2,...                     |
| 19                                                                                                                                                             | pl 0 C09 darms | AllGenBank+EMBL+DDBJ+PDB | BLASTN     | <a href="#">ref NM_214277.1 </a>        | SusScrofa aminopeptidase N (ANPEP), mRNA                         |
| 20                                                                                                                                                             | pl 0 C11 darms | AllGenBank+EMBL+DDBJ+PDB | BLASTN     | <a href="#">ref XM_125703.4 </a>        | PREDICTED:Mus musculus RIKEN cDNA 2210404...                     |
| 21                                                                                                                                                             | pl 0 C12 darms | AllGenBank+EMBL+DDBJ+PDB | BLASTN     | <a href="#">ref NM_214277.1 </a>        | SusScrofa aminopeptidase N (ANPEP), mRNA                         |
| 22                                                                                                                                                             | pl 0 D02 darms | AllGenBank+EMBL+DDBJ+PDB | BLASTN     | <a href="#">dbj AK000138.1 </a>         | Homosapiens cDNA FLJ20131 fis, clone COL06357                    |
| 23                                                                                                                                                             | pl 0 D03 darms | AllGenBank+EMBL+DDBJ+PDB | BLASTN     | <a href="#">emb X54724.1 SSMMP1</a>     | Porcinemmp1 mRNA for matrix metallopro...                        |
| 24                                                                                                                                                             | pl 0 D05 darms | AllGenBank+EMBL+DDBJ+PDB | BLASTN     | <a href="#">ref NM_214277.1 </a>        | SusScrofa aminopeptidase N (ANPEP), mRNA                         |
| 25                                                                                                                                                             | pl 0 D06 darms | AllGenBank+EMBL+DDBJ+PDB | BLASTN     | <a href="#">ref NM_000134.2 </a>        | Homosapiens fatty acid binding protein 2,...                     |
| 26                                                                                                                                                             | pl 0 D07 darms | AllGenBank+EMBL+DDBJ+PDB | BLASTN     | <a href="#">ref XR_025617.1 </a>        | Pan troglodytes maltase-glucoamylase (MGAM), mRNA                |
| 27                                                                                                                                                             | pl 0 D08 darms | AllGenBank+EMBL+DDBJ+PDB | BLASTN     | <a href="#">gb AY358469.1 </a>          | Homosapiens clone DNA59613 phospholipase in...                   |
| 28                                                                                                                                                             | pl 0 D09 darms | AllGenBank+EMBL+DDBJ+PDB | BLASTN     | <a href="#">ref NM_007289.1 </a>        | Homosapiens membrane metallo-endopeptidas...                     |
| 29                                                                                                                                                             | pl 0 D11 darms | AllGenBank+EMBL+DDBJ+PDB | BLASTN     | <a href="#">emb AL773559.16 </a>        | PigDNA sequence from clone XX-711D2, comp...                     |
| 30                                                                                                                                                             | pl 0 D12 darms | AllGenBank+EMBL+DDBJ+PDB | BLASTN     | <a href="#">ref NM_214131.1 </a>        | SusScrofa caspase-3 (CASP3), mRNA                                |
| 31                                                                                                                                                             | pl 0 E05 darms | AllGenBank+EMBL+DDBJ+PDB | BLASTN     | <a href="#">gb L13068.1 PIGCABIPRO</a>  | SusScrofa calbindin D-9k mRNA, comp...                           |
| 32                                                                                                                                                             | pl 0 E07 darms | AllGenBank+EMBL+DDBJ+PDB | BLASTN     | <a href="#">ref NM_214389.1 </a>        | SusScrofa glutathione S-transferase (GSTA...                     |
| 33                                                                                                                                                             | pl 0 E09 darms | AllGenBank+EMBL+DDBJ+PDB | BLASTN     | <a href="#">ref NM_214389.1 </a>        | SusScrofa glutathione S-transferase (GSTA...                     |
| 34                                                                                                                                                             | pl 0 E10 darms | AllGenBank+EMBL+DDBJ+PDB | BLASTN     | <a href="#">ref NM_214389.1 </a>        | SusScrofa glutathione S-transferase (GSTA...                     |
| 35                                                                                                                                                             | pl 0 E11 darms | AllGenBank+EMBL+DDBJ+PDB | BLASTN     | <a href="#">ref NM_032194.1 </a>        | Homosapiens brix domain containing 1 (BXD...                     |
| 36                                                                                                                                                             | pl 0 E12 darms | AllGenBank+EMBL+DDBJ+PDB | BLASTN     | <a href="#">gb L13068.1 PIGCABIPRO</a>  | SusScrofa calbindin D-9k mRNA, comp...                           |
| 37                                                                                                                                                             | pl 0 F02 darms | AllGenBank+EMBL+DDBJ+PDB | BLASTN     | <a href="#">gb AC069008.6 </a>          | Homosapiens BAC clone RP11-815N20 from 7, c...                   |
| 38                                                                                                                                                             | pl 0 F04 darms | AllGenBank+EMBL+DDBJ+PDB | BLASTN     | <a href="#">emb BX296515.11 </a>        | PigDNA sequence from clone PigE-121D21, c...                     |
| 39                                                                                                                                                             | pl 0 F06 darms | AllGenBank+EMBL+DDBJ+PDB | BLASTN     | <a href="#">gb L13068.1 PIGCABIPRO</a>  | SusScrofa calbindin D-9k mRNA, comp...                           |
| 40                                                                                                                                                             | pl 0 F07 darms | AllGenBank+EMBL+DDBJ+PDB | BLASTN     | <a href="#">ref NM_019010.1 </a>        | Homosapiens keratin 20 (KRT20), mRNA                             |
| 41                                                                                                                                                             | pl 0 F08 darms | AllGenBank+EMBL+DDBJ+PDB | BLASTN     | <a href="#">gb BC018622.1 </a>          | Homosapiens cell division cycle 42 (GTP bin...                   |
| 42                                                                                                                                                             | pl 0 F09 darms | AllGenBank+EMBL+DDBJ+PDB | BLASTN     | <a href="#">emb BX088590.7 </a>         | PigDNA sequence from clone XX-591C4, compl...                    |

| no. | plate ID       | database                   | Blast_type | Genbank or TC acc.                       | Hit                                                                            |
|-----|----------------|----------------------------|------------|------------------------------------------|--------------------------------------------------------------------------------|
| 43  | pl 0 F10 darms | AllGenBank+EMBL+DDBJ+PDB   | BLASTN     | <a href="#">gb AY358671.1 </a>           | Homosapiens clone DNA58855 TCCE518 (UNQ518)...                                 |
| 44  | pl 0 F12 darms | AllGenBank+EMBL+DDBJ+PDB   | BLASTN     | <a href="#">ref NM_000134.2 </a>         | Homosapiens fatty acid binding protein 2,...                                   |
| 45  | pl 0 G02 darms | AllGenBank+EMBL+DDBJ+PDB   | BLASTN     | <a href="#">ref NM_214389.1 </a>         | Susscrofa glutathione S-transferase (GSTA...                                   |
| 46  | pl 0 G03 darms | AllGenBank+EMBL+DDBJ+PDB   | BLASTN     | <a href="#">gb BC013417.2 </a>           | Homosapiens X-prolyl aminopeptidase (aminop...                                 |
| 47  | pl 0 G04 darms | AllGenBank+EMBL+DDBJ+PDB   | BLASTN     | <a href="#">dbj AK000138.1 </a>          | Homosapiens cDNA FLJ20131 fis, clone COL06357                                  |
| 48  | pl 0 G05 darms | AllGenBank+EMBL+DDBJ+PDB   | BLASTN     | <a href="#">gb BC004512.2 </a>           | Homosapiens DKFZp564J157 protein, mRNA (cDN...                                 |
| 49  | pl 0 G06 darms | DFCI Sus scrofa Gene Index | BLASTN     | <a href="#">pig TC202067</a>             | Apolipoprotein R precursor (Apo-R)                                             |
| 50  | pl 0 G07 darms | AllGenBank+EMBL+DDBJ+PDB   | BLASTN     | <a href="#">gb AC092656.1 </a>           | Homosapiens BAC clone RP11-455G16 from 4, c...                                 |
| 51  | pl 0 G08 darms | AllGenBank+EMBL+DDBJ+PDB   | BLASTN     | <a href="#">ref NM_007289.1 </a>         | Homosapiens membrane metallo-endopeptidas...                                   |
| 52  | pl 0 G09 darms | AllGenBank+EMBL+DDBJ+PDB   | BLASTN     | <a href="#">ref NM_214389.1 </a>         | Susscrofa glutathione S-transferase (GSTA...                                   |
| 53  | pl 0 G10 darms | AllGenBank+EMBL+DDBJ+PDB   | BLASTN     | <a href="#">gb AY430094.1 </a>           | Homosapiens ecto-nucleoside triphosphate di...                                 |
| 54  | pl 0 H01 darms | AllGenBank+EMBL+DDBJ+PDB   | BLASTN     | <a href="#">ref NM_000134.2 </a>         | Homosapiens fatty acid binding protein 2,...                                   |
| 55  | pl 0 H02 darms | AllGenBank+EMBL+DDBJ+PDB   | BLASTN     | <a href="#">dbj AK000138.1 </a>          | Homosapiens cDNA FLJ20131 fis, clone COL06357                                  |
| 56  | pl 0 H04 darms | AllGenBank+EMBL+DDBJ+PDB   | BLASTX     | <a href="#">AAQ88833</a>                 | (blastx) Phospholipase inhibitor (PLA2 ihibitor domain)                        |
| 57  | pl 0 H05 darms | AllGenBank+EMBL+DDBJ+PDB   | BLASTN     | <a href="#">ref NM_213850.1 </a>         | Susscrofa glutathione S-transferase (LOC3...                                   |
| 58  | pl 0 H06 darms | AllGenBank+EMBL+DDBJ+PDB   | BLASTN     | <a href="#">gb AY337045.1 </a>           | Susscrofa breed Duroc mitochondrion, comple...                                 |
| 59  | pl 0 H07 darms | AllGenBank+EMBL+DDBJ+PDB   | BLASTN     | <a href="#">ref NM_214389.1 </a>         | Susscrofa glutathione S-transferase (GSTA...                                   |
| 60  | pl 0 H10 darms | AllGenBank+EMBL+DDBJ+PDB   | BLASTN     | <a href="#">ref NM_014585.3 </a>         | Homosapiens solute carrier family 40 (iro...                                   |
| 61  | pl 0 H12 darms | AllGenBank+EMBL+DDBJ+PDB   | BLASTN     | <a href="#">gb AY358469.1 </a>           | Homosapiens clone DNA59613 phospholipase in...                                 |
| 62  | pl 1 A02 darmf | AllGenBank+EMBL+DDBJ+PDB   | BLASTN     | <a href="#">emb X77640.1 SSLFABP</a>     | S.scrofamRNA for liver fatty acid bin...                                       |
| 63  | pl 1 A02 darmn | AllGenBank+EMBL+DDBJ+PDB   | BLASTN     | <a href="#">dbj AB113354.2 </a>          | Susscrofa 433 kb genomic segment, located ...                                  |
| 64  | pl 1 A04 darms | AllGenBank+EMBL+DDBJ+PDB   | BLASTN     | <a href="#">ref NM_000035.2 </a>         | Homosapiens aldolase B, fructose-bisphosp...                                   |
| 65  | pl 1 A04 darms | AllGenBank+EMBL+DDBJ+PDB   | BLASTN     | <a href="#">gb BC029399.1 </a>           | Homosapiens aldolase B, fructose-bisphospha...                                 |
| 66  | pl 1 A06 darms | AllGenBank+EMBL+DDBJ+PDB   | BLASTN     | <a href="#">ref NM_214389.1 </a>         | Susscrofa glutathione S-transferase (GSTA...                                   |
| 67  | pl 1 A11 darmn | AllGenBank+EMBL+DDBJ+PDB   | BLASTN     | <a href="#">AL449063</a>                 | Human DNA sequence from clone RP11-413P11                                      |
| 68  | pl 1 A12 darmn | AllGenBank+EMBL+DDBJ+PDB   | BLASTN     | <a href="#">gb M18159.1 PIGUBP</a>       | Piggpoly-ubiquitin mRNA, 3' end                                                |
| 69  | pl 1 A12 darms | AllGenBank+EMBL+DDBJ+PDB   | BLASTN     | <a href="#">gb AC002469.8 </a>           | Homosapiens Chromosome 9p22 Cosmid Clone 23...                                 |
| 70  | pl 1 B02 darms | AllGenBank+EMBL+DDBJ+PDB   | BLASTN     | <a href="#">gb AC007132.3 AC007132</a>   | Homosapiens BAC clone RP11-444A22 f...                                         |
| 71  | pl 1 B04 darmf | AllGenBank+EMBL+DDBJ+PDB   | BLASTN     | <a href="#">ref NM_000134.2 </a>         | Homosapiens fatty acid binding protein 2,...                                   |
| 72  | pl 1 B04 darms | AllGenBank+EMBL+DDBJ+PDB   | BLASTN     | <a href="#">gb AC073838.6 </a>           | Homosapiens BAC clone RP11-398G12 from 2, c...                                 |
| 73  | pl 1 B07 darmf | AllGenBank+EMBL+DDBJ+PDB   | BLASTN     | <a href="#">ref NM_003122.2 </a>         | Homosapiens serine protease inhibitor, Ka...                                   |
| 74  | pl 1 B08 darmf | AllGenBank+EMBL+DDBJ+PDB   | BLASTN     | <a href="#">emb AJ293397.1 HSA293397</a> | Homosapiens mRNA differentially e...                                           |
| 75  | pl 1 B10 darms | AllGenBank+EMBL+DDBJ+PDB   | BLASTN     | <a href="#">gb AY358470.1 </a>           | Homosapiens clone DNA60629 CLCA4 (UNQ562) m...                                 |
| 76  | pl 1 C02 darmn | AllGenBank+EMBL+DDBJ+PDB   | BLASTN     | <a href="#">ref NM_009955.2 </a>         | Musmusculus dihydropyrimidinase-like 2 (D...                                   |
| 77  | pl 1 C03 darmn | AllGenBank+EMBL+DDBJ+PDB   | BLASTN     | <a href="#">ref XM_295865.3 </a>         | PREDICTED:Homo sapiens chromosome 10 open...                                   |
| 78  | pl 1 C05 darmf | AllGenBank+EMBL+DDBJ+PDB   | BLASTN     | <a href="#">NM_017654</a>                | sterile alpha motif domain containing 9 / expressed in aggressive fibromatosis |
| 79  | pl 1 C05 darmn | AllGenBank+EMBL+DDBJ+PDB   | BLASTN     | <a href="#">gb BC029276.1 </a>           | Homosapiens, clone IMAGE:4455666, mRNA                                         |
| 80  | pl 1 C06 darmf | AllGenBank+EMBL+DDBJ+PDB   | BLASTN     | <a href="#">_AF304202</a>                | Sus scrofa breed Landrace mitochondr...                                        |
| 81  | pl 1 C07 darmf | AllGenBank+EMBL+DDBJ+PDB   | BLASTN     | <a href="#">gb AF304203.1 AF304203</a>   | Susscrofa breed Swedish wild boar m...                                         |
| 82  | pl 1 C07 darms | AllGenBank+EMBL+DDBJ+PDB   | BLASTN     | <a href="#">ref NM_002670.1 </a>         | Homosapiens plastin 1 (I isoform) (PLS1),...                                   |
| 83  | pl 1 C08 darms | DFCI Sus scrofa Gene Index | BLASTN     | <a href="#">pig TC229874</a>             | Microsomal triglyceride transfer protein large subunit precursor               |
| 84  | pl 1 C09 darms | DFCI Sus scrofa Gene Index | BLASTN     | <a href="#">pig TC149619</a>             | similar to meprin A beta-subunit precursor                                     |
| 85  | pl 1 C10 darms | AllGenBank+EMBL+DDBJ+PDB   | BLASTN     | <a href="#">gb L01083.1 RABUGT2BC</a>    | Oryctolagusuniculus UDP-glucuronosy...                                         |
| 86  | pl 1 C11 darmf | AllGenBank+EMBL+DDBJ+PDB   | BLASTN     | <a href="#">gb L13068.1 PIGCABIPRO</a>   | SusScrofa calbindin D-9k mRNA, comp...                                         |
| 87  | pl 1 C11 darmn | AllGenBank+EMBL+DDBJ+PDB   | BLASTN     | <a href="#">gb M18159.1 PIGUBP</a>       | Piggpoly-ubiquitin mRNA, 3' end                                                |
| 88  | pl 1 C11 darms | AllGenBank+EMBL+DDBJ+PDB   | BLASTN     | <a href="#">ref NM_004776.2 </a>         | Homosapiens UDP-Gal:betaGlcNAc beta 1,4- ...                                   |

| no. | plate ID        | database                   | Blast_type | Genbank or TC acc.        | Hit                                                                        |
|-----|-----------------|----------------------------|------------|---------------------------|----------------------------------------------------------------------------|
| 89  | pl 1 D01 darms  | DFCI Sus scrofa Gene Index | BLASTN     | pig TC292739              | unknown                                                                    |
| 90  | pl 1 D02 darmf  | AllGenBank+EMBL+DDBJ+PDB   | BLASTN     | gb AY334492.1             | Susscrofa breed Jeju native black mitochond...                             |
| 91  | pl 1 D03 darmn  | AllGenBank+EMBL+DDBJ+PDB   | BLASTN     | emb BX296548.20           | PigDNA sequence from clone PigE-19319, co...                               |
| 92  | pl 1 D03 darms  | AllGenBank+EMBL+DDBJ+PDB   | BLASTN     | ref NM_214053.1           | Susscrofa hyaluronan synthase 2 (SHAS2), ...                               |
| 93  | pl 1 D04 darms  | AllGenBank+EMBL+DDBJ+PDB   | BLASTN     | gb L11235.1 PIGAPOLIP     | Susscrofa apolipoprotein B gene, 3' ...                                    |
| 94  | pl 1 D09 darmf  | AllGenBank+EMBL+DDBJ+PDB   | BLASTN     | gb AC000353.27            | Homosapiens Chromosome 11q13 BAC Clone 18h...                              |
| 95  | pl 1 D10 darmf  | AllGenBank+EMBL+DDBJ+PDB   | BLASTN     | gb AY011178.1             | Susscrofa 16S ribosomal RNA gene, partial s...                             |
| 96  | pl 1 D11 darmn  | AllGenBank+EMBL+DDBJ+PDB   | BLASTN     | gb M18159.1 PIGUBP        | Pigpoly-ubiquitin mRNA, 3' end                                             |
| 97  | pl 1 E02 darms  | DFCI Sus scrofa Gene Index | BLASTN     | pig TC219047              | Hepatocyte growth factor activator inhibitor type 2-related small pprotein |
| 98  | pl 1 E08 darmf  | AllGenBank+EMBL+DDBJ+PDB   | BLASTN     | gb BC020498.1             | Homosapiens coatomer protein complex, subun...                             |
| 99  | pl 1 E10 darmn  | AllGenBank+EMBL+DDBJ+PDB   | BLASTN     | gb M18159.1 PIGUBP        | Pigpoly-ubiquitin mRNA, 3' end                                             |
| 100 | pl 1 E12 darmf  | AllGenBank+EMBL+DDBJ+PDB   | BLASTN     | ref NM_174239.2           | Bostaurus aldehyde dehydrogenase 1 family...                               |
| 101 | pl 1 E12 darms  | AllGenBank+EMBL+DDBJ+PDB   | BLASTN     | ref NM_002299.2           | Homosapiens lactase (LCT), mRNA                                            |
| 102 | pl 1 F01 darmf  | AllGenBank+EMBL+DDBJ+PDB   | BLASTN     | gb AY337045.1             | Susscrofa breed Duroc mitochondrion, comple...                             |
| 103 | pl 1 F02 darmf  | AllGenBank+EMBL+DDBJ+PDB   | BLASTN     | gb L13068.1 PIGCABIPRO    | SusScrofa calbindin D-9k mRNA, comp...                                     |
| 104 | pl 1 F02 darms  | AllGenBank+EMBL+DDBJ+PDB   | BLASTN     | gb AY358671.1             | Homosapiens clone DNA58855 TCCE518 (UNQ518)...                             |
| 105 | pl 1 F07 darmf  | AllGenBank+EMBL+DDBJ+PDB   | BLASTN     | gb AF304203.1 AF304203    | Susscrofa breed Swedish wild boar m...                                     |
| 106 | pl 1 F08 darmn  | AllGenBank+EMBL+DDBJ+PDB   | BLASTN     | ref NM_006826.2           | Homosapiens tyrosine 3-monoxygenase/trypr...                               |
| 107 | pl 1 F08 darms  | AllGenBank+EMBL+DDBJ+PDB   | BLASTN     | ref NM_006398.2           | Homosapiens ubiquitin D (UBD), mRNA                                        |
| 108 | pl 1 F10 darmn  | AllGenBank+EMBL+DDBJ+PDB   | BLASTN     | gb AC007613.8             | Homosapiens chromosome 16 clone RP11-49006,...                             |
| 109 | pl 1 F10 darms  | AllGenBank+EMBL+DDBJ+PDB   | BLASTN     | gb L01083.1 RABUGT2BC     | Oryctolagusuniculus UDP-glucuronosy...                                     |
| 110 | pl 1 F12 darms  | AllGenBank+EMBL+DDBJ+PDB   | BLASTN     | ref NM_144646.2           | Homosapiens immunoglobulin J polypeptide,...                               |
| 111 | pl 1 G03 darmf  | AllGenBank+EMBL+DDBJ+PDB   | BLASTN     | ref NM_000134.2           | Homosapiens fatty acid binding protein 2,...                               |
| 112 | pl 1 G05 darms  | AllGenBank+EMBL+DDBJ+PDB   | BLASTN     | emb Z27166.1 OCRLPH1      | O.cuniculus(BL20) mRNA for-lactase-ph...                                   |
| 113 | pl 1 G06 darmf  | AllGenBank+EMBL+DDBJ+PDB   | BLASTN     | gb L13068.1 PIGCABIPRO    | SusScrofa calbindin D-9k mRNA, comp...                                     |
| 114 | pl 1 G07 darmf  | AllGenBank+EMBL+DDBJ+PDB   | BLASTN     | emb X77640.1 SSLFABP      | S.scrofamRNA for liver fatty acid bin...                                   |
| 115 | pl 1 G08 darms  | DFCI Sus scrofa Gene Index | BLASTN     | pig TC226966              | Complement component C9 precursor                                          |
| 116 | pl 1 G10 darmf  | DFCI Sus scrofa Gene Index | BLASTN     | pig TC219434              | cytochrome c oxidase subunit II                                            |
| 117 | pl 1 H03 darmn  | AllGenBank+EMBL+DDBJ+PDB   | BLASTN     | gb AC092634.3             | Homosapiens BAC clone RP11-34016 from 7, co...                             |
| 118 | pl 1 H04 darmf  | AllGenBank+EMBL+DDBJ+PDB   | BLASTN     | gb BC029553.1             | Homosapiens DEAD (Asp-Glu-Ala-Asp) box poly...                             |
| 119 | pl 1 H06 darmf  | DFCI Sus scrofa Gene Index | BLASTN     | pig TC219401 cytochrome c | cytochrome c oxidase subunit II                                            |
| 120 | pl 1 H06 darms  | AllGenBank+EMBL+DDBJ+PDB   | BLASTN     | ref NM_214185.1           | Susscrofa microsomal triglyceride transfe...                               |
| 121 | pl 1 H07 darms  | AllGenBank+EMBL+DDBJ+PDB   | BLASTN     | AF217517                  | Homo sapiens uncharacterized bone marrow protein BM041 mRNA (proline rich  |
| 122 | pl 1 H09 darms  | DFCI Sus scrofa Gene Index | BLASTN     | pig TC222777              | immunoglobulin J chain                                                     |
| 123 | pl 11 A07 darmn | AllGenBank+EMBL+DDBJ+PDB   | BLASTN     | emb Z29372.1 OAMRALDB     | O.ariesmRNA for aldolase B                                                 |
| 124 | pl 11 A08 darmn | AllGenBank+EMBL+DDBJ+PDB   | BLASTN     | ref NM_213850.1           | Susscrofa glutathione S-transferase (LOC3...                               |
| 125 | pl 11 B02 darmn | AllGenBank+EMBL+DDBJ+PDB   | BLASTN     | gb AC016724.11            | Homosapiens BAC clone RP11-339F22 from 2, ...                              |
| 126 | pl 11 B05 darmn | AllGenBank+EMBL+DDBJ+PDB   | BLASTN     | emb AJ002189.1 SSJ002189  | Susscrofa complete mitochondrial DNA                                       |
| 127 | pl 11 C01 darmn | AllGenBank+EMBL+DDBJ+PDB   | BLASTN     | db AK097515.1             | Homosapiens cDNA FLJ40196 fis, clone TEST1...                              |
| 128 | pl 11 C02 darmn | AllGenBank+EMBL+DDBJ+PDB   | BLASTN     | NM_205809                 | Bos taurus mucus-type core 2 beta-1,6...                                   |
| 129 | pl 11 C06 darmn | AllGenBank+EMBL+DDBJ+PDB   | BLASTN     | gb AF271776.1 AF271776    | Homosapiens DC48 mRNA, complete cds                                        |
| 130 | pl 11 C07 darmn | AllGenBank+EMBL+DDBJ+PDB   | BLASTN     | gb AY317138.1             | Homosapiens CPS1 isoform mRNA, complete cds...                             |
| 131 | pl 11 E02 darmn | AllGenBank+EMBL+DDBJ+PDB   | BLASTN     | AC091506                  | Sus scrofa clone RP44-348C20, complete sequence                            |
| 132 | pl 11 E07 darmn | AllGenBank+EMBL+DDBJ+PDB   | BLASTN     | emb Z29372.1 OAMRALDB     | O.ariesmRNA for aldolase B                                                 |
| 133 | pl 11 E09 darmn | AllGenBank+EMBL+DDBJ+PDB   | BLASTN     | ref NM_000134.2           | Homosapiens fatty acid binding protein 2,...                               |
| 134 | pl 11 F01 darmn | AllGenBank+EMBL+DDBJ+PDB   | BLASTN     | AF382821                  | Sus scrofa thioredoxin mRNA                                                |

| no. | plate ID        | database                       | Blast_type | Genbank or TC acc.                       | Hit                                                                         |
|-----|-----------------|--------------------------------|------------|------------------------------------------|-----------------------------------------------------------------------------|
| 135 | pl 11 F06 darmn | AllGenBank+EMBL+DDBJ+PDB       | BLASTN     | <a href="#">gb AF304203.1 AF304203</a>   | Susscrofa breed Swedish wild boar m...                                      |
| 136 | pl 11 G01 darmn | AllGenBank+EMBL+DDBJ+PDB       | BLASTN     | <a href="#">ref NM_004668.1 </a>         | Homo sapiens maltase-glucoamylase (alpha-g...                               |
| 137 | pl 11 G02 darmn | AllGenBank+EMBL+DDBJ+PDB       | BLASTN     | <a href="#">ref NM_004668.1 </a>         | Homo sapiens maltase-glucoamylase (alpha-g...                               |
| 138 | pl 11 G04 darmn | AllGenBank+EMBL+DDBJ+PDB       | BLASTN     | <a href="#">ref NM_174239.2 </a>         | Bostaurus aldehyde dehydrogenase 1 family...                                |
| 139 | pl 11 H06 darmn | AllGenBank+EMBL+DDBJ+PDB       | BLASTN     | <a href="#">gb BT007535.1 </a>           | Syntheticconstruct Homo sapiens guanylate b...                              |
| 140 | pl 11 H12 darmn | AllGenBank+EMBL+DDBJ+PDB       | BLASTN     | <a href="#">ref NM_214384.1 </a>         | Susscrofa folylpoly-gamma-glutamate carbo...                                |
| 141 | pl 12 A02 darmn | AllGenBank+EMBL+DDBJ+PDB       | BLASTN     | <a href="#">ref NM_021133.2 </a>         | Homo sapiens ribonuclease L (2',5'-oligois...                               |
| 142 | pl 12 B03 darmn | AllGenBank+EMBL+DDBJ+PDB       | BLASTN     | <a href="#">emb AL117672.5 CNS01DRN</a>  | Humanchromosome 14 DNA sequence BA...                                       |
| 143 | pl 12 B07 darmn | AllGenBank+EMBL+DDBJ+PDB       | BLASTN     | <a href="#">gb AC092755.4 </a>           | Homo sapiens chromosome 15 clone RP11-361D15...                             |
| 144 | pl 12 B07 darmn | DFCI Cattle Gene Index (former | BLASTN     | cattle TC272801                          | weakly similar to Oligo/dipeptide transport protein Sulfolobus solfataricus |
| 145 | pl 12 B12 darmn | AllGenBank+EMBL+DDBJ+PDB       | BLASTN     | <a href="#">ref NM_004396.2 </a>         | Homo sapiens DEAD (Asp-Glu-Ala-Asp) box po...                               |
| 146 | pl 12 C04 darmn | AllGenBank+EMBL+DDBJ+PDB       | BLASTX     | <a href="#">NP_008644</a>                | (blastx) NADH dehydrogenase subunit 5                                       |
| 147 | pl 12 C05 darmn | AllGenBank+EMBL+DDBJ+PDB       | BLASTN     | <a href="#">gb M18159.1 PIGUBP</a>       | Piggpoly-ubiquitin mRNA, 3' end                                             |
| 148 | pl 12 D09 darmn | AllGenBank+EMBL+DDBJ+PDB       | BLASTN     | <a href="#">NM_001004034</a>             | Sus scrofa non-histone protein HMG1                                         |
| 149 | pl 12 D10 darmn | AllGenBank+EMBL+DDBJ+PDB       | BLASTN     | <a href="#">gb L11235.1 PIGAPOLIP</a>    | Susscrofa apolipoprotein B gene, 3' ...                                     |
| 150 | pl 12 E02 darmn | AllGenBank+EMBL+DDBJ+PDB       | BLASTN     | <a href="#">gb BC048271.1 </a>           | Homo sapiens KIAA0663 gene product, mRNA (cd...                             |
| 151 | pl 12 E04 darmn | AllGenBank+EMBL+DDBJ+PDB       | BLASTN     | <a href="#">gb AC005332.1 AC005332</a>   | Homo sapiens chromosome 17, clone hR...                                     |
| 152 | pl 12 E05 darmn | AllGenBank+EMBL+DDBJ+PDB       | BLASTN     | <a href="#">NM_010739</a>                | Mus musculus mucin 13, epithelial transmembrane (Muc13), mRNA.              |
| 153 | pl 12 F01 darmn | AllGenBank+EMBL+DDBJ+PDB       | BLASTN     | <a href="#">gb AY358671.1 </a>           | Homo sapiens clone DNA58855 TCCE518 (UNQ518)...                             |
| 154 | pl 12 H06 darmn | AllGenBank+EMBL+DDBJ+PDB       | BLASTN     | <a href="#">gb AF016833.2 AF016833</a>   | Homo sapiens maltase-glucoamylase mR...                                     |
| 155 | pl 13 A01 darmn | AllGenBank+EMBL+DDBJ+PDB       | BLASTN     | <a href="#">gb AC091297.3 </a>           | Susscrofa clone RP44-52N13, complete sequence                               |
| 156 | pl 13 A04 darmn | AllGenBank+EMBL+DDBJ+PDB       | BLASTN     | <a href="#">gb AC004231.1 AC004231</a>   | Homo sapiens chromosome 17, clone hR...                                     |
| 157 | pl 13 A10 darmn | AllGenBank+EMBL+DDBJ+PDB       | BLASTN     | <a href="#">gb AC092874.2 </a>           | Susscrofa clone RP44-326F1, complete sequence                               |
| 158 | pl 13 B02 darmn | AllGenBank+EMBL+DDBJ+PDB       | BLASTN     | <a href="#">gb BC061581.1 </a>           | Homo sapiens pyrophosphatase (inorganic), mR...                             |
| 159 | pl 13 B08 darmn | DFCI Sus scrofa Gene Index     | BLASTN     | pig TC233996                             | Unknown                                                                     |
| 160 | pl 13 D03 darmn | AllGenBank+EMBL+DDBJ+PDB       | BLASTN     | <a href="#">dbj AB113355.2 </a>          | Susscrofa 433 kb genomic segment, located ...                               |
| 161 | pl 13 D06 darmn | AllGenBank+EMBL+DDBJ+PDB       | BLASTN     | <a href="#">gb AY317138.1 </a>           | Homo sapiens CP51 isoform mRNA, complete cds...                             |
| 162 | pl 13 D08 darmn | AllGenBank+EMBL+DDBJ+PDB       | BLASTN     | <a href="#">ref NM_001712.2 </a>         | Homo sapiens carcinoembryonic antigen-rela...                               |
| 163 | pl 13 E01 darmn | AllGenBank+EMBL+DDBJ+PDB       | BLASTN     | <a href="#">gb AC104852.3 </a>           | Homo sapiens chromosome 8, clone CTD-2571E19...                             |
| 164 | pl 13 E03 darmn | AllGenBank+EMBL+DDBJ+PDB       | BLASTN     | <a href="#">ref NM_000134.2 </a>         | Homo sapiens fatty acid binding protein 2,...                               |
| 165 | pl 13 E08 darmn | AllGenBank+EMBL+DDBJ+PDB       | BLASTN     | <a href="#">gb BC020923.1 </a>           | Homo sapiens cDNA clone MGC:24624 IMAGE:4247...                             |
| 166 | pl 13 E10 darmn | AllGenBank+EMBL+DDBJ+PDB       | BLASTN     | <a href="#">ref NM_002299.2 </a>         | Homo sapiens lactase (LCT), mRNA                                            |
| 167 | pl 13 F11 darmn | AllGenBank+EMBL+DDBJ+PDB       | BLASTN     | <a href="#">ref NM_001004021.1 </a>      | Rattusnorvegicus type I keratin KA13 (...)                                  |
| 168 | pl 13 G11 darmn | AllGenBank+EMBL+DDBJ+PDB       | BLASTN     | <a href="#">emb BX324144.4 </a>          | PigDNA sequence from clone XX-1044B7, comp...                               |
| 169 | pl 14 A04 darmn | AllGenBank+EMBL+DDBJ+PDB       | BLASTN     | <a href="#">gb AC145868.2 </a>           | Pantroglodytes BAC clone RP43-39F11 from 7,...                              |
| 170 | pl 14 A07 darmn | AllGenBank+EMBL+DDBJ+PDB       | BLASTN     | <a href="#">gb AY369786.1 </a>           | Macacamulatta actin beta subunit (ACTB) mRN...                              |
| 171 | pl 14 A12 darmn | AllGenBank+EMBL+DDBJ+PDB       | BLASTN     | <a href="#">emb CR596695.1 </a>          | full-lengthcDNA clone CSODI079YF01 of Plac...                               |
| 172 | pl 14 C03 darmn | AllGenBank+EMBL+DDBJ+PDB       | BLASTN     | <a href="#">gb M18159.1 PIGUBP</a>       | Piggpoly-ubiquitin mRNA, 3' end                                             |
| 173 | pl 14 D10 darmn | AllGenBank+EMBL+DDBJ+PDB       | BLASTN     | <a href="#">gb AY337045.1 </a>           | Susscrofa breed Duroc mitochondrion, comple...                              |
| 174 | pl 14 D12 darmn | AllGenBank+EMBL+DDBJ+PDB       | BLASTN     | <a href="#">gb AF304203.1 AF304203</a>   | Susscrofa breed Swedish wild boar m...                                      |
| 175 | pl 14 E08 darmn | AllGenBank+EMBL+DDBJ+PDB       | BLASTN     | <a href="#">ref NM_214423.1 </a>         | Susscrofa cytochrome P450 3A29 (CYP3A29),...                                |
| 176 | pl 14 G10 darmn | AllGenBank+EMBL+DDBJ+PDB       | BLASTN     | <a href="#">emb AJ427478.2 SSC427478</a> | Susscrofa ASIP gene for agouti si...                                        |
| 177 | pl 14 H02 darmn | AllGenBank+EMBL+DDBJ+PDB       | BLASTN     | <a href="#">ref NM_032440.1 </a>         | Homo sapiens ligand-dependent corepressor ...                               |
| 178 | pl 14 H03 darmn | AllGenBank+EMBL+DDBJ+PDB       | BLASTN     | <a href="#">gb AY550069.1 </a>           | Susscrofa cytoskeletal beta actin mRNA, par...                              |
| 179 | pl 14 H08 darmn | DFCI Sus scrofa Gene Index     | BLASTN     | pig TC219401 cytochrome c                | cytochrome c oxidase subunit 3                                              |
| 180 | pl 14 H11 darmn | AllGenBank+EMBL+DDBJ+PDB       | BLASTN     | <a href="#">ref NM_002031.2 </a>         | Homo sapiens fyn-related kinase (FRK), mRNA                                 |

| no. | plate ID        | database                   | Blast_type | Genbank or TC acc.                        | Hit                                                                  |
|-----|-----------------|----------------------------|------------|-------------------------------------------|----------------------------------------------------------------------|
| 181 | pl 15 A02 darmn | AllGenBank+EMBL+DDBJ+PDB   | BLASTN     | <a href="#">gb AY358470.1 </a>            | Homosapiens clone DNA60629 CLCA4 (UNQ562) m...                       |
| 182 | pl 15 A03 darmn | AllGenBank+EMBL+DDBJ+PDB   | BLASTN     | <a href="#">ref XM_295865.3 </a>          | PREDICTED:Homo sapiens chromosome 10 open...                         |
| 183 | pl 15 A09 darmn | AllGenBank+EMBL+DDBJ+PDB   | BLASTN     | <a href="#">ref NM_214389.1 </a>          | Susscrofa glutathione S-transferase (GSTA...                         |
| 184 | pl 15 B04 darmn | AllGenBank+EMBL+DDBJ+PDB   | BLASTN     | <a href="#">gb U12761.1 OAU12761</a>      | Ovaries aldehyde dehydrogenase mRNA...                               |
| 185 | pl 15 B07 darmn | AllGenBank+EMBL+DDBJ+PDB   | BLASTN     | <a href="#">gb AF016833.2 AF016833</a>    | Homosapiens maltase-glucoamylase mR...                               |
| 186 | pl 15 C01 darmn | AllGenBank+EMBL+DDBJ+PDB   | BLASTN     | <a href="#">gb M18159.1 PIGUBP</a>        | Pigpoly-ubiquitin mRNA, 3' end                                       |
| 187 | pl 15 C03 darmn | AllGenBank+EMBL+DDBJ+PDB   | BLASTN     | <a href="#">dbj AK097515.1 </a>           | Homosapiens cDNA FLJ40196 fis, clone TESTI...                        |
| 188 | pl 15 D06 darmn | AllGenBank+EMBL+DDBJ+PDB   | BLASTN     | <a href="#">AJ504726</a>                  | CMD47_F10_80.fasta UMNMPM3 Sus scrofa cDNA clone PPSUBLIB_32F10      |
| 189 | pl 15 D12 darmn | AllGenBank+EMBL+DDBJ+PDB   | BLASTN     | <a href="#">ref NM_214389.1 </a>          | Susscrofa glutathione S-transferase (GSTA...                         |
| 190 | pl 15 E06 darmn | AllGenBank+EMBL+DDBJ+PDB   | BLASTN     | <a href="#">ref NM_001004021.1 </a>       | Rattusnorvegicus type I keratin KA13 (...)                           |
| 191 | pl 15 F05 darmn | AllGenBank+EMBL+DDBJ+PDB   | BLASTN     | <a href="#">ref NM_214389.1 </a>          | Susscrofa glutathione S-transferase (GSTA...                         |
| 192 | pl 15 F11 darmn | AllGenBank+EMBL+DDBJ+PDB   | BLASTN     | <a href="#">ref NM_019010.1 </a>          | Homosapiens keratin 20 (KRT20), mRNA                                 |
| 193 | pl 15 G02 darmn | AllGenBank+EMBL+DDBJ+PDB   | BLASTN     | <a href="#">gb AC091402.2 </a>            | Susscrofa clone RP44-363K13, complete sequence                       |
| 194 | pl 15 G09 darmn | AllGenBank+EMBL+DDBJ+PDB   | BLASTN     | <a href="#">emb Z29372.1 OAMRALDB</a>     | O.ariesmRNA for aldolase B                                           |
| 195 | pl 15 G10 darmn | AllGenBank+EMBL+DDBJ+PDB   | BLASTN     | <a href="#">gb M34044.1 PIGSGLT1A</a>     | PigNa+/glucose cotransporter protein...                              |
| 196 | pl 15 G12 darmn | AllGenBank+EMBL+DDBJ+PDB   | BLASTN     | <a href="#">gb L11235.1 PIGAPOLIP</a>     | Susscrofa apolipoprotein B gene, 3' ...                              |
| 197 | pl 16 A04 darmn | AllGenBank+EMBL+DDBJ+PDB   | BLASTN     | <a href="#">AF275344</a>                  | Bos taurus lecithin retinol a..                                      |
| 198 | pl 16 C09 darmn | AllGenBank+EMBL+DDBJ+PDB   | BLASTN     | <a href="#">gb AF304203.1 AF304203</a>    | Susscrofa breed Swedish wild boar m...                               |
| 199 | pl 16 D03 darmn | AllGenBank+EMBL+DDBJ+PDB   | BLASTN     | <a href="#">gb AF269224.1 </a>            | Synthetic construct Canis familiaris his-tagged-multidrug resistance |
| 200 | pl 16 D05 darmn | DFCI Sus scrofa Gene Index | BLASTN     | <a href="#">pig TC219401</a>              | cytochrome c oxidase subunit 3                                       |
| 201 | pl 16 D09 darmn | AllGenBank+EMBL+DDBJ+PDB   | BLASTN     | <a href="#">ref NM_000134.2 </a>          | Homosapiens fatty acid binding protein 2,...                         |
| 202 | pl 16 E03 darmn | DFCI Sus scrofa Gene Index | BLASTN     | <a href="#">pig TC219401</a>              | cytochrome c oxidase subunit 3                                       |
| 203 | pl 16 E04 darmn | AllGenBank+EMBL+DDBJ+PDB   | BLASTN     | <a href="#">ref NM_214432.1 </a>          | Susscrofa cytochrome P450 51 (CYP51), mRNA                           |
| 204 | pl 16 E05 darmn | AllGenBank+EMBL+DDBJ+PDB   | BLASTN     | <a href="#">emb AJ620655.1 </a>           | Bostaurus mRNA for signal transducer and a...                        |
| 205 | pl 16 E08 darmn | AllGenBank+EMBL+DDBJ+PDB   | BLASTN     | <a href="#">gb BC038967.1 </a>            | Homosapiens glucosamine (N-acetyl)-6-sulfat...                       |
| 206 | pl 16 F01 darmn | AllGenBank+EMBL+DDBJ+PDB   | BLASTN     | <a href="#">gb AC083843.5 </a>            | Homosapiens chromosome 8, clone RP11-157B5,...                       |
| 207 | pl 16 F03 darmn | AllGenBank+EMBL+DDBJ+PDB   | BLASTN     | <a href="#">gb AY345130.1 </a>            | Bostaurus carcinoembryonic antigen-related ...                       |
| 208 | pl 16 F07 darmn | AllGenBank+EMBL+DDBJ+PDB   | BLASTN     | <a href="#">ref NM_214423.1 </a>          | Susscrofa cytochrome P450 3A29 (CYP3A29),...                         |
| 209 | pl 16 G03 darmn | AllGenBank+EMBL+DDBJ+PDB   | BLASTN     | <a href="#">gb AY337045.1 </a>            | Susscrofa breed Duroc mitochondrion, comple...                       |
| 210 | pl 16 G05 darmn | AllGenBank+EMBL+DDBJ+PDB   | BLASTN     | <a href="#">gb AC091401.2 </a>            | Susscrofa clone RP44-198J22, complete sequence                       |
| 211 | pl 16 G06 darmn | AllGenBank+EMBL+DDBJ+PDB   | BLASTN     | <a href="#">gb AC091506.2 </a>            | Susscrofa clone RP44-348C20, complete sequence                       |
| 212 | pl 16 G11 darmn | AllGenBank+EMBL+DDBJ+PDB   | BLASTN     | <a href="#">gb AC087424.2 </a>            | Susscrofa clone RP44-56M21, complete sequence                        |
| 213 | pl 16 G12 darmn | AllGenBank+EMBL+DDBJ+PDB   | BLASTN     | <a href="#">emb Z29372.1 OAMRALDB</a>     | O.ariesmRNA for aldolase B                                           |
| 214 | pl 16 H11 darmn | DFCI Sus scrofa Gene Index | BLASTN     | <a href="#">pig TC219434 cytochrome c</a> | cytochrome c oxidase subunit 3                                       |
| 215 | pl 17 B01 darmn | AllGenBank+EMBL+DDBJ+PDB   | BLASTN     | <a href="#">gb AC136964.2 </a>            | Susscrofa domestica clone RP44-154L9, compl...                       |
| 216 | pl 17 B04 darmn | AllGenBank+EMBL+DDBJ+PDB   | BLASTN     | <a href="#">gb AC124906.3 </a>            | Equuscaballus clone CH241-268I16, complete ...                       |
| 217 | pl 17 B07 darmn | AllGenBank+EMBL+DDBJ+PDB   | BLASTN     | <a href="#">ref NM_000134.2 </a>          | Homosapiens fatty acid binding protein 2,...                         |
| 218 | pl 17 B12 darmn | AllGenBank+EMBL+DDBJ+PDB   | BLASTN     | <a href="#">ref NM_007362.2 </a>          | Homosapiens nuclear cap binding protein s...                         |
| 219 | pl 17 D06 darmn | AllGenBank+EMBL+DDBJ+PDB   | BLASTN     | <a href="#">gb AY334492.1 </a>            | Susscrofa breed Jeju native black mitochond...                       |
| 220 | pl 17 D12 darmn | AllGenBank+EMBL+DDBJ+PDB   | BLASTN     | <a href="#">ref NM_174003.2 </a>          | Bostaurus calpastatin (CAST), mRNA                                   |
| 221 | pl 17 E05 darmn | AllGenBank+EMBL+DDBJ+PDB   | BLASTN     | <a href="#">ref NM_000134.2 </a>          | Homosapiens fatty acid binding protein 2,...                         |
| 222 | pl 17 E06 darmn | AllGenBank+EMBL+DDBJ+PDB   | BLASTN     | <a href="#">ref NM_000134.2 </a>          | Homosapiens fatty acid binding protein 2,...                         |
| 223 | pl 17 F01 darmn | AllGenBank+EMBL+DDBJ+PDB   | BLASTN     | <a href="#">XM_851073</a>                 | zinc finger, CCHC domain containing 6 isoform 8                      |
| 224 | pl 17 G09 darmn | DFCI Sus scrofa Gene Index | BLASTN     | <a href="#">pig TC219401</a>              | cytochrome c oxidase subunit 3                                       |
| 225 | pl 18 A03 darmn | AllGenBank+EMBL+DDBJ+PDB   | BLASTN     | <a href="#">NM_152615</a>                 | Poly (ADP-ribose) polymerase family, member 15                       |
| 226 | pl 18 C05 darmn | AllGenBank+EMBL+DDBJ+PDB   | BLASTN     | <a href="#">gb AC093743.2 </a>            | Homosapiens BAC clone RP11-24N19 from 7, co...                       |

| no. | plate ID        | database                      | Blast_type | Genbank or TC acc.                       | Hit                                                                       |
|-----|-----------------|-------------------------------|------------|------------------------------------------|---------------------------------------------------------------------------|
| 227 | pl 18 C08 darmn | AllGenBank+EMBL+DDBJ+PDB      | BLASTN     | <a href="#">gb BC048271.1</a>            | Homosapiens KIAA0663 gene product, mRNA (cd...                            |
| 228 | pl 18 C11 darmn | AllGenBank+EMBL+DDBJ+PDB      | BLASTN     | <a href="#">gb AY358470.1</a>            | Homosapiens clone DNA60629 CLCA4 (UNQ562) m...                            |
| 229 | pl 18 D01 darmn | AllGenBank+EMBL+DDBJ+PDB      | BLASTN     | <a href="#">emb AJ293392.1 HSA293392</a> | Homosapiens mRNA differentially e...                                      |
| 230 | pl 18 D05 darmn | AllGenBank+EMBL+DDBJ+PDB      | BLASTN     | <a href="#">ref NM_213850.1</a>          | Susscrofa glutathione S-transferase (LOC3...                              |
| 231 | pl 18 F03 darmn | AllGenBank+EMBL+DDBJ+PDB      | BLASTN     | <a href="#">ref NM_001712.2</a>          | Homosapiens carcinoembryonic antigen-rela...                              |
| 232 | pl 18 F12 darmn | AllGenBank+EMBL+DDBJ+PDB      | BLASTN     | <a href="#">gb BC004132.2</a>            | Homosapiens lysyl-tRNA synthetase, mRNA (cd...                            |
| 233 | pl 18 G04 darmn | AllGenBank+EMBL+DDBJ+PDB      | BLASTN     | <a href="#">ref NM_012095.3</a>          | Homosapiens adaptor-related protein compl...                              |
| 234 | pl 18 G09 darmn | AllGenBank+EMBL+DDBJ+PDB      | BLASTN     | <a href="#">emb BX088590.7</a>           | PigDNA sequence from clone XX-591C4, compl...                             |
| 235 | pl 19 A03 darmn | AllGenBank+EMBL+DDBJ+PDB      | BLASTN     | <a href="#">emb AJ276855.1 KPN276855</a> | Klebsiellapneumoniae partial SL03...                                      |
| 236 | pl 19 A08 darmn | AllGenBank+EMBL+DDBJ+PDB      | BLASTN     | <a href="#">emb X99893.1 SSTMP835</a>    | S.scrofatmp83.5 gene                                                      |
| 237 | pl 19 B06 darmn | AllGenBank+EMBL+DDBJ+PDB      | BLASTN     | <a href="#">ref NM_019010.1</a>          | Homosapiens keratin 20 (KRT20), mRNA                                      |
| 238 | pl 19 C04 darmn | DFCI Sus scrofa Gene Index    | BLASTN     | <a href="#">pig TC240942</a>             | Ubiquitin C                                                               |
| 239 | pl 19 E02 darmn | AllGenBank+EMBL+DDBJ+PDB      | BLASTN     | <a href="#">gb BC038967.1</a>            | Homosapiens glucosamine (N-acetyl)-6-sulfat...                            |
| 240 | pl 19 F01 darmn | DFCI Human Gene Index (former | BLASTN     | <a href="#">hum THC1931910</a>           | similar to HCV-associated microtubular aggregate protein p44 (IFN-induced |
| 241 | pl 19 F02 darmn | AllGenBank+EMBL+DDBJ+PDB      | BLASTN     | <a href="#">ref NM_214389.1</a>          | Susscrofa glutathione S-transferase (GSTA...                              |
| 242 | pl 19 F05 darmn | AllGenBank+EMBL+DDBJ+PDB      | BLASTN     | <a href="#">ref NM_214432.1</a>          | Susscrofa cytochrome P450 51 (CYP51), mRNA                                |
| 243 | pl 19 F06 darmn | AllGenBank+EMBL+DDBJ+PDB      | BLASTN     | <a href="#">emb BX005425.12</a>          | Danio rerio glutamate-cysteine ligase, modifier subunit (gclm),           |
| 244 | pl 19 G07 darmn | AllGenBank+EMBL+DDBJ+PDB      | BLASTN     | <a href="#">gb M95283.1 BOVIOPPP</a>     | Bovineinorganic pyrophosphatase mRNA ...                                  |
| 245 | pl 19 H05 darmn | AllGenBank+EMBL+DDBJ+PDB      | BLASTN     | <a href="#">ref NM_214405.1</a>          | Susscrofa methylmalonyl-CoA mutase (MUT),...                              |
| 246 | pl 19 H09 darmn | AllGenBank+EMBL+DDBJ+PDB      | BLASTN     | <a href="#">L11235</a>                   | Sus scrofa apolipoprotein B gene...                                       |
| 247 | pl 2 A01 darmn  | AllGenBank+EMBL+DDBJ+PDB      | BLASTN     | <a href="#">gb AC092874.2</a>            | Susscrofa clone RP44-326F1, complete sequence                             |
| 248 | pl 2 A02 darmn  | AllGenBank+EMBL+DDBJ+PDB      | BLASTN     | <a href="#">gb AY358671.1</a>            | Homosapiens clone DNA58855 TCCE518 (UNQ518)...                            |
| 249 | pl 2 A02 darms  | AllGenBank+EMBL+DDBJ+PDB      | BLASTN     | <a href="#">emb Z29372.1 OAMRALDB</a>    | O.ariesmRNA for aldolase B                                                |
| 250 | pl 2 A03 darmf  | AllGenBank+EMBL+DDBJ+PDB      | BLASTN     | <a href="#">emb BX538238.1 HSM806472</a> | Homosapiens mRNA; cDNA DKFZp686B0...                                      |
| 251 | pl 2 A04 darmf  | AllGenBank+EMBL+DDBJ+PDB      | BLASTN     | <a href="#">ref NM_203372.1</a>          | Homosapiens acyl-CoA synthetase long-chai...                              |
| 252 | pl 2 A06 darmf  | DFCI Sus scrofa Gene Index    | BLASTN     | <a href="#">pig TC219277</a>             | NADH dehydrogenase subunit 4L                                             |
| 253 | pl 2 A09 darmf  | AllGenBank+EMBL+DDBJ+PDB      | BLASTN     | <a href="#">gb AY011178.1</a>            | Susscrofa 16S ribosomal RNA gene, partial s...                            |
| 254 | pl 2 A10 darms  | AllGenBank+EMBL+DDBJ+PDB      | BLASTN     | <a href="#">ref NM_205787.1</a>          | Bostaurus pancreatic thread protein (PTP)...                              |
| 255 | pl 2 A11 darms  | AllGenBank+EMBL+DDBJ+PDB      | BLASTN     | <a href="#">BC022272</a>                 | guanylate binding protein 2 (GBP-2), interferon-inducible, mRNA           |
| 256 | pl 2 A9 darmf   | AllGenBank+EMBL+DDBJ+PDB      | BLASTN     | <a href="#">gb AY334492.1</a>            | Susscrofa breed Jeju native black mitochond...                            |
| 257 | pl 2 B01 darms  | AllGenBank+EMBL+DDBJ+PDB      | BLASTN     | <a href="#">ref XM_209196.3</a>          | PREDICTED:Homo sapiens similar to HSPC323...                              |
| 258 | pl 2 B03 darms  | AllGenBank+EMBL+DDBJ+PDB      | BLASTN     | <a href="#">ref NM_000134.2</a>          | Homosapiens fatty acid binding protein 2,...                              |
| 259 | pl 2 B04 darmn  | AllGenBank+EMBL+DDBJ+PDB      | BLASTN     | <a href="#">ref NM_000384.1</a>          | Homosapiens apolipoprotein B (including A...                              |
| 260 | pl 2 B05 darmn  | AllGenBank+EMBL+DDBJ+PDB      | BLASTN     | <a href="#">emb Z79595.1 PRXYNC</a>      | P.ruminicolaxynC gene                                                     |
| 261 | pl 2 B06 darms  | AllGenBank+EMBL+DDBJ+PDB      | BLASTN     | <a href="#">ref NM_000134.2</a>          | Homosapiens fatty acid binding protein 2,...                              |
| 262 | pl 2 B07 darms  | AllGenBank+EMBL+DDBJ+PDB      | BLASTN     | <a href="#">ref NM_214277.1</a>          | Susscrofa aminopeptidase N (ANPEP), mRNA                                  |
| 263 | pl 2 B08 darmf  | AllGenBank+EMBL+DDBJ+PDB      | BLASTN     | <a href="#">gb AF304202.1 AF304202</a>   | Susscrofa breed Landrace mitochondr...                                    |
| 264 | pl 2 B09 darms  | AllGenBank+EMBL+DDBJ+PDB      | BLASTN     | <a href="#">ref NM_000134.2</a>          | Homosapiens fatty acid binding protein 2,...                              |
| 265 | pl 2 B11 darms  | AllGenBank+EMBL+DDBJ+PDB      | BLASTN     | <a href="#">ref XM_375747.2</a>          | PREDICTED:Homo sapiens similar to Interfe...                              |
| 266 | pl 2 C01 darmf  | AllGenBank+EMBL+DDBJ+PDB      | BLASTN     | <a href="#">ref NM_000134.2</a>          | Homosapiens fatty acid binding protein 2,...                              |
| 267 | pl 2 C01 darms  | AllGenBank+EMBL+DDBJ+PDB      | BLASTN     | <a href="#">ref NM_003122.2</a>          | Homosapiens serine protease inhibitor, Ka...                              |
| 268 | pl 2 C03 darmf  | AllGenBank+EMBL+DDBJ+PDB      | BLASTN     | <a href="#">gb AY334492.1</a>            | Susscrofa breed Jeju native black mitochond...                            |
| 269 | pl 2 C03 darms  | AllGenBank+EMBL+DDBJ+PDB      | BLASTN     | <a href="#">ref NM_019010.1</a>          | Homosapiens keratin 20 (KRT20), mRNA                                      |
| 270 | pl 2 C04 darmf  | AllGenBank+EMBL+DDBJ+PDB      | BLASTN     | <a href="#">gb AF304203.1 AF304203</a>   | Susscrofa breed Swedish wild boar m...                                    |
| 271 | pl 2 C04 darmn  | AllGenBank+EMBL+DDBJ+PDB      | BLASTN     | <a href="#">ref XM_496384.1</a>          | PREDICTED:Homo sapiens similar to Gm566 p...                              |
| 272 | pl 2 C04 darms  | AllGenBank+EMBL+DDBJ+PDB      | BLASTN     | <a href="#">gb L11235.1 PIGAPOLIP</a>    | Susscrofa apolipoprotein B gene, 3' ...                                   |
|     |                 |                               |            |                                          |                                                                           |
|     |                 |                               |            |                                          |                                                                           |

| no. | plate ID       | database                      | Blast_type | Genbank or TC acc.                       | Hit                                                                 |
|-----|----------------|-------------------------------|------------|------------------------------------------|---------------------------------------------------------------------|
| 273 | pl 2 C05 darmf | AllGenBank+EMBL+DDBJ+PDB      | BLASTN     | <a href="#">gb AY334492.1 </a>           | Susscrofa breed Jeju native black mitochond...                      |
| 274 | pl 2 C06 darms | AllGenBank+EMBL+DDBJ+PDB      | BLASTN     | <a href="#">gb M34044.1 PIGSGLT1A</a>    | PigNa+/glucose cotransporter protein...                             |
| 275 | pl 2 C08 darms | AllGenBank+EMBL+DDBJ+PDB      | BLASTN     | <a href="#">ref NM_214358.1 </a>         | Susscrofa spermidine/spermine N-acetyltra...                        |
| 276 | pl 2 C09 darmf | AllGenBank+EMBL+DDBJ+PDB      | BLASTN     | <a href="#">gb AY334492.1 </a>           | Susscrofa breed Jeju native black mitochond...                      |
| 277 | pl 2 C09 darms | AllGenBank+EMBL+DDBJ+PDB      | BLASTN     | <a href="#">ref NM_000384.1 </a>         | Homosapiens apolipoprotein B (including A...                        |
| 278 | pl 2 C12 darms | AllGenBank+EMBL+DDBJ+PDB      | BLASTN     | <a href="#">emb X54724.1 SSMMP1</a>      | Porcinemmp1 mRNA for matrix metallopro...                           |
| 279 | pl 2 D01 darms | AllGenBank+EMBL+DDBJ+PDB      | BLASTN     | <a href="#">gb AY358671.1 </a>           | Homosapiens clone DNA58855 TCCE518 (UNQ518)...                      |
| 280 | pl 2 D02 darmf | AllGenBank+EMBL+DDBJ+PDB      | BLASTN     | <a href="#">ref NM_004724.2 </a>         | Homosapiens ZW10 homolog, centromere/kine...                        |
| 281 | pl 2 D04 darms | AllGenBank+EMBL+DDBJ+PDB      | BLASTN     | <a href="#">gb AY358567.1 </a>           | Homosapiens clone DNA48320 GW112 (UNQ362) m...                      |
| 282 | pl 2 D05 darms | AllGenBank+EMBL+DDBJ+PDB      | BLASTN     | <a href="#">ref NM_000035.2 </a>         | Homosapiens aldolase B, fructose-bisphosp...                        |
| 283 | pl 2 D08 darms | AllGenBank+EMBL+DDBJ+PDB      | BLASTN     | <a href="#">emb X77640.1 SSLFABP</a>     | S.scrofamRNA for liver fatty acid bin...                            |
| 284 | pl 2 D09 darms | DFCI Sus scrofa Gene Index    | BLASTN     | <a href="#">pig TC262280</a>             | immunoglobulin J chain                                              |
| 285 | pl 2 D10 darmf | AllGenBank+EMBL+DDBJ+PDB      | BLASTN     | <a href="#">gb AY334492.1 </a>           | Susscrofa breed Jeju native black mitochond...                      |
| 286 | pl 2 D11 darmf | AllGenBank+EMBL+DDBJ+PDB      | BLASTN     | <a href="#">gb AY337045.1 </a>           | Susscrofa breed Duroc mitochondrion, comple...                      |
| 287 | pl 2 D11 darmn | AllGenBank+EMBL+DDBJ+PDB      | BLASTN     | <a href="#">gb AP001582.4 </a>           | Homosapiens genomic DNA, chromosome 11q, c...                       |
| 288 | pl 2 D12 darms | AllGenBank+EMBL+DDBJ+PDB      | BLASTN     | <a href="#">ref NM_214358.1 </a>         | Susscrofa spermidine/spermine N-acetyltra...                        |
| 289 | pl 2 E02 darmf | DFCI Human Gene Index (former | BLASTN     | <a href="#">human THC2262345</a>         | fatty acid-binding protein Contig 15                                |
| 290 | pl 2 E03 darms | AllGenBank+EMBL+DDBJ+PDB      | BLASTN     | <a href="#">emb X77640.1 SSLFABP</a>     | S.scrofamRNA for liver fatty acid bin...                            |
| 291 | pl 2 E04 darms | AllGenBank+EMBL+DDBJ+PDB      | BLASTN     | <a href="#">gb L11235.1 PIGAPOLIP</a>    | Susscrofa apolipoprotein B gene, 3' ...                             |
| 292 | pl 2 E07 darmf | AllGenBank+EMBL+DDBJ+PDB      | BLASTN     | <a href="#">NM_000134</a>                | Homo sapiens fatty acid binding protein 2, intestinal (FABP2), mRNA |
| 293 | pl 2 E12 darmf | AllGenBank+EMBL+DDBJ+PDB      | BLASTN     | <a href="#">gb AC091623.2 </a>           | Susscrofa clone RP44-183E24, complete sequence                      |
| 294 | pl 2 E12 darmn | AllGenBank+EMBL+DDBJ+PDB      | BLASTN     | <a href="#">gb AY587061.1 </a>           | Susscrofa ataxia-telangiectasia mutated pro...                      |
| 295 | pl 2 F01 darms | AllGenBank+EMBL+DDBJ+PDB      | BLASTN     | <a href="#">emb AL832451.2 HSM803759</a> | Homosapiens mRNA; cDNA DKFzP451C2...                                |
| 296 | pl 2 F02 darmf | AllGenBank+EMBL+DDBJ+PDB      | BLASTN     | <a href="#">ref NM_000134.2 </a>         | Homosapiens fatty acid binding protein 2,...                        |
| 297 | pl 2 F02 darmn | AllGenBank+EMBL+DDBJ+PDB      | BLASTN     | <a href="#">gb AC097351.2 </a>           | Susscrofa clone RP44-368D24, complete sequence                      |
| 298 | pl 2 F05 darmf | AllGenBank+EMBL+DDBJ+PDB      | BLASTN     | <a href="#">gb AC012100.7 </a>           | Homosapiens chromosome 15 clone RP11-507J18...                      |
| 299 | pl 2 F05 darms | AllGenBank+EMBL+DDBJ+PDB      | BLASTN     | <a href="#">ref NM_213850.1 </a>         | Susscrofa glutathione S-transferase (LOC3...                        |
| 300 | pl 2 F07 darmf | DFCI Sus scrofa Gene Index    | BLASTN     | <a href="#">pig TC225330</a>             | Human BAL protein                                                   |
| 301 | pl 2 F08 darmf | AllGenBank+EMBL+DDBJ+PDB      | BLASTN     | <a href="#">gb AF304203.1 AF304203</a>   | Susscrofa breed Swedish wild boar m...                              |
| 302 | pl 2 F11 darms | AllGenBank+EMBL+DDBJ+PDB      | BLASTN     | <a href="#">gb AY358469.1 </a>           | Homosapiens clone DNA59613 phospholipase in...                      |
| 303 | pl 2 G02 darmf | AllGenBank+EMBL+DDBJ+PDB      | BLASTN     | <a href="#">emb AL356785.18 </a>         | HumanDNA sequence from clone RP13-206I21 ...                        |
| 304 | pl 2 G02 darms | AllGenBank+EMBL+DDBJ+PDB      | BLASTN     | <a href="#">ref NM_214358.1 </a>         | Susscrofa spermidine/spermine N-acetyltra...                        |
| 305 | pl 2 G04 darmf | AllGenBank+EMBL+DDBJ+PDB      | BLASTN     | <a href="#">gb AY334492.1 </a>           | Susscrofa breed Jeju native black mitochond...                      |
| 306 | pl 2 G04 darms | AllGenBank+EMBL+DDBJ+PDB      | BLASTN     | <a href="#">ref NM_002153.1 </a>         | Homosapiens hydroxysteroid (17-beta) dehy...                        |
| 307 | pl 2 G06 darms | AllGenBank+EMBL+DDBJ+PDB      | BLASTN     | <a href="#">gb AC092908.9 </a>           | Homosapiens 3q BAC RP11-757I12 (Roswell Par...                      |
| 308 | pl 2 G07 darmf | AllGenBank+EMBL+DDBJ+PDB      | BLASTN     | <a href="#">emb AJ236932.1 SSR236932</a> | Pig mRNA for hypoth. protein small intestine                        |
| 309 | pl 2 G07 darms | AllGenBank+EMBL+DDBJ+PDB      | BLASTN     | <a href="#">gb AY358671.1 </a>           | Homosapiens clone DNA58855 TCCE518 (UNQ518)...                      |
| 310 | pl 2 G08 darmf | AllGenBank+EMBL+DDBJ+PDB      | BLASTN     | <a href="#">gb AY011178.1 </a>           | Susscrofa 16S ribosomal RNA gene, partial s...                      |
| 311 | pl 2 G08 darms | AllGenBank+EMBL+DDBJ+PDB      | BLASTN     | <a href="#">ref NM_214389.1 </a>         | Susscrofa glutathione S-transferase (GSTA...                        |
| 312 | pl 2 G11 darms | AllGenBank+EMBL+DDBJ+PDB      | BLASTN     | <a href="#">ref NM_213850.1 </a>         | Susscrofa glutathione S-transferase (LOC3...                        |
| 313 | pl 2 G12 darms | AllGenBank+EMBL+DDBJ+PDB      | BLASTN     | <a href="#">ref NM_205787.1 </a>         | Bostaurus pancreatic thread protein (PTP)...                        |
| 314 | pl 2 H04 darmf | DFCI Sus scrofa Gene Index    | BLASTN     | <a href="#">pig TC219401</a>             | cytochrome c oxidase subunit 3                                      |
| 315 | pl 2 H07 darmn | AllGenBank+EMBL+DDBJ+PDB      | BLASTN     | <a href="#">emb AL354883.14 </a>         | HumanDNA sequence from clone RP1-67N4 on ...                        |
| 316 | pl 2 H07 darms | AllGenBank+EMBL+DDBJ+PDB      | BLASTN     | <a href="#">ref NM_002299.2 </a>         | Homosapiens lactase (LCT), mRNA                                     |
| 317 | pl 2 H09 darms | AllGenBank+EMBL+DDBJ+PDB      | BLASTN     | <a href="#">ref NM_005021.2 </a>         | Homosapiens ectonucleotide pyrophosphatas...                        |
| 318 | pl 2 H10 darms | AllGenBank+EMBL+DDBJ+PDB      | BLASTN     | <a href="#">ref NM_205787.1 </a>         | Bostaurus pancreatic thread protein (PTP)...                        |
|     |                |                               |            |                                          |                                                                     |
|     |                |                               |            |                                          |                                                                     |

| no. | plate ID        | database                      | Blast_type | Genbank or TC acc.                        | Hit                                             |
|-----|-----------------|-------------------------------|------------|-------------------------------------------|-------------------------------------------------|
| 319 | pl 2 H12 darmf  | AllGenBank+EMBL+DDBJ+PDB      | BLASTN     | <a href="#">ref NM_014923.2 </a>          | Homosapiens fibronectin type III domain c...    |
| 320 | pl 2 H12 darms  | AllGenBank+EMBL+DDBJ+PDB      | BLASTN     | <a href="#">ref NM_175773.1 </a>          | Bostaurus immunoglobulin J chain (IGJ), mRNA    |
| 321 | pl 2 H06 darms  | AllGenBank+EMBL+DDBJ+PDB      | BLASTN     | <a href="#">gb AY358671.1 </a>            | Homosapiens clone DNA58855 TCCE518 (UNQ518)...  |
| 322 | pl 20 A01 darmn | AllGenBank+EMBL+DDBJ+PDB      | BLASTN     | <a href="#">gb L11235.1 PIGAPOLIP</a>     | Susscrofa apolipoprotein B gene, 3' ...         |
| 323 | pl 20 A04 darmn | AllGenBank+EMBL+DDBJ+PDB      | BLASTN     | <a href="#">gb U49973.1 HSU49973</a>      | HumanTigger1 transposable element, co...        |
| 324 | pl 20 B01 darmn | AllGenBank+EMBL+DDBJ+PDB      | BLASTN     | <a href="#">gb AC073624.28 </a>           | Homosapiens chromosome 17, clone RP11-537K...   |
| 325 | pl 20 B12 darmn | AllGenBank+EMBL+DDBJ+PDB      | BLASTN     | <a href="#">emb BX323846.2 </a>           | PigDNA sequence from clone XX-43B6, comple...   |
| 326 | pl 20 C03 darmn | AllGenBank+EMBL+DDBJ+PDB      | BLASTN     | <a href="#">gb AC091402.2 </a>            | Susscrofa clone RP44-363K13, complete sequence  |
| 327 | pl 20 E10 darmn | AllGenBank+EMBL+DDBJ+PDB      | BLASTN     | <a href="#">ref NM_004766.1 </a>          | Homosapiens coatomer protein complex, sub...    |
| 328 | pl 20 E11 darmn | AllGenBank+EMBL+DDBJ+PDB      | BLASTN     | <a href="#">ref NM_004668.1 </a>          | Homosapiens maltase-glucoamylase (alpha-g...    |
| 329 | pl 20 F10 darmn | AllGenBank+EMBL+DDBJ+PDB      | BLASTN     | <a href="#">ref NM_214420.1 </a>          | Susscrofa cytochrome P450 2C49 (CYP2C49),...    |
| 330 | pl 20 G02 darmn | AllGenBank+EMBL+DDBJ+PDB      | BLASTN     | <a href="#">emb AL773591.7 </a>           | PigDNA sequence from clone XX-35B1, comple...   |
| 331 | pl 20 G10 darmn | AllGenBank+EMBL+DDBJ+PDB      | BLASTN     | <a href="#">gb AF375778.1 </a>            | Susscrofa microsatellite UMNp226 sequence       |
| 332 | pl 20 H01 darmn | AllGenBank+EMBL+DDBJ+PDB      | BLASTN     | <a href="#">emb AL606724.17 </a>          | MouseDNA sequence from clone RP23-285D3 o...    |
| 333 | pl 20 H03 darmn | AllGenBank+EMBL+DDBJ+PDB      | BLASTN     | <a href="#">gb AF170527.1 AF170527</a>    | Susscrofa glycoprotein IIIa (GPIIIa)...         |
| 334 | pl 20 H09 darmn | AllGenBank+EMBL+DDBJ+PDB      | BLASTN     | <a href="#">ref NM_214420.1 </a>          | Susscrofa cytochrome P450 2C49 (CYP2C49),...    |
| 335 | pl 3 A03 darmf  | AllGenBank+EMBL+DDBJ+PDB      | BLASTN     | <a href="#">gb M34044.1 PIGSGLT1A</a>     | PigNa+/glucose cotransporter protein...         |
| 336 | pl 3 A04 darmn  | AllGenBank+EMBL+DDBJ+PDB      | BLASTN     | <a href="#">gb L11235.1 PIGAPOLIP</a>     | Susscrofa apolipoprotein B gene, 3' ...         |
| 337 | pl 3 A06 darms  | AllGenBank+EMBL+DDBJ+PDB      | BLASTN     | <a href="#">gb L11235.1 PIGAPOLIP</a>     | Susscrofa apolipoprotein B gene, 3' ...         |
| 338 | pl 3 A07 darmf  | DFCI Sus scrofa Gene Index    | BLASTN     | <a href="#">pig TC219401</a>              | cytochrome c oxidase subunit 3                  |
| 339 | pl 3 A08 miltn  | DFCI Sus scrofa Gene Index    | BLASTN     | <a href="#">pig TC219277</a>              | NADH dehydrogenase subunit 4L                   |
| 340 | pl 3 A09 darmn  | AllGenBank+EMBL+DDBJ+PDB      | BLASTN     | <a href="#">gb AY337045.1 </a>            | Susscrofa breed Duroc mitochondrion, comple...  |
| 341 | pl 3 A11 darms  | DFCI Human Gene Index (former | BLASTN     | <a href="#">human THC2244691</a>          | Core histone macro-H2A.1                        |
| 342 | pl 3 B05 darmf  | DFCI Sus scrofa Gene Index    | BLASTN     | <a href="#">pig TC219434</a>              | cytochrome c oxidase subunit II                 |
| 343 | pl 3 B06 darms  | AllGenBank+EMBL+DDBJ+PDB      | BLASTN     | <a href="#">ref NM_214389.1 </a>          | Susscrofa glutathione S-transferase (GSTA...    |
| 344 | pl 3 B08 darmf  | AllGenBank+EMBL+DDBJ+PDB      | BLASTN     | <a href="#">gb AC073288.27 </a>           | Homosapiens 3 BAC RP11-543D10 (Roswell Par...   |
| 345 | pl 3 B09 darmf  | AllGenBank+EMBL+DDBJ+PDB      | BLASTN     | <a href="#">emb BX296548.20 </a>          | PigDNA sequence from clone PigE-19319, co...    |
| 346 | pl 3 B09 darms  | AllGenBank+EMBL+DDBJ+PDB      | BLASTN     | <a href="#">gb AK025079.1 </a>            | Homosapiens cDNA: FLJ21426 fis, clone COL0...   |
| 347 | pl 3 B10 darms  | AllGenBank+EMBL+DDBJ+PDB      | BLASTN     | <a href="#">ref NM_213850.1 </a>          | Susscrofa glutathione S-transferase (LOC3...    |
| 348 | pl 3 B11 darms  | AllGenBank+EMBL+DDBJ+PDB      | BLASTN     | <a href="#">ref NM_214423.1 </a>          | Susscrofa cytochrome P450 3A29 (CYP3A29),...    |
| 349 | pl 3 C01 darms  | AllGenBank+EMBL+DDBJ+PDB      | BLASTN     | <a href="#">ref NM_000134.2 </a>          | Homosapiens fatty acid binding protein 2,...    |
| 350 | pl 3 C02 darms  | AllGenBank+EMBL+DDBJ+PDB      | BLASTN     | <a href="#">gb AC055845.15 </a>           | Homosapiens chromosome 11, clone RP11-682B...   |
| 351 | pl 3 C03 darmf  | DFCI Sus scrofa Gene Index    | BLASTN     | <a href="#">pig TC200383 UP RL9_HUMAN</a> | 60S ribosomal protein L9                        |
| 352 | pl 3 C05 darms  | AllGenBank+EMBL+DDBJ+PDB      | BLASTN     | <a href="#">gb L11235.1 PIGAPOLIP</a>     | Susscrofa apolipoprotein B gene, 3' ...         |
| 353 | pl 3 C07 darmf  | AllGenBank+EMBL+DDBJ+PDB      | BLASTN     | <a href="#">gb AY337045.1 </a>            | Susscrofa breed Duroc mitochondrion, comple...  |
| 354 | pl 3 C10 darmf  | AllGenBank+EMBL+DDBJ+PDB      | BLASTN     | <a href="#">AK025296</a>                  | Homo sapiens cDNA: FLJ21643 fis, clone COL08382 |
| 355 | pl 3 C10 darms  | AllGenBank+EMBL+DDBJ+PDB      | BLASTN     | <a href="#">ref NM_213850.1 </a>          | Susscrofa glutathione S-transferase (LOC3...    |
| 356 | pl 3 C11 darms  | AllGenBank+EMBL+DDBJ+PDB      | BLASTN     | <a href="#">ref NM_002791.1 </a>          | Homosapiens proteasome (prosome, macropai...    |
| 357 | pl 3 C12 darmf  | AllGenBank+EMBL+DDBJ+PDB      | BLASTN     | <a href="#">emb AL513533.15 </a>          | HumanDNA sequence from clone RP11-341B24 ...    |
| 358 | pl 3 C12 darmn  | AllGenBank+EMBL+DDBJ+PDB      | BLASTN     | <a href="#">ref NG_001580.1 </a>          | Homosapiens YWHAQ pseudogene 2 (YWHAQP2) ...    |
| 359 | pl 3 C04 darmn  | AllGenBank+EMBL+DDBJ+PDB      | BLASTN     | <a href="#">gb AC097505.2 </a>            | Homosapiens BAC clone RP11-362J17 from 4, c...  |
| 360 | pl 3 D01 darmf  | AllGenBank+EMBL+DDBJ+PDB      | BLASTN     | <a href="#">emb AJ236932.1 SSR236932</a>  | Susscrofa mRNA for hypothetical p...            |
| 361 | pl 3 D01 darms  | AllGenBank+EMBL+DDBJ+PDB      | BLASTN     | <a href="#">ref NM_214358.1 </a>          | Susscrofa spermidine/spermine N-acetyltra...    |
| 362 | pl 3 D04 darms  | DFCI Sus scrofa Gene Index    | BLASTN     | <a href="#">pig TC222048</a>              | GDPG glutaredoxin                               |
| 363 | pl 3 D05 darms  | AllGenBank+EMBL+DDBJ+PDB      | BLASTN     | <a href="#">gb L11235.1 PIGAPOLIP</a>     | Susscrofa apolipoprotein B gene, 3' ...         |
| 364 | pl 3 D06 darmf  | AllGenBank+EMBL+DDBJ+PDB      | BLASTN     | <a href="#">gb AF304203.1 AF304203</a>    | Susscrofa breed Swedish wild boar m...          |



| no. | plate ID       | database                   | Blast_type | Genbank or TC acc.                       | Hit                                                                   |
|-----|----------------|----------------------------|------------|------------------------------------------|-----------------------------------------------------------------------|
| 365 | pl 3 D06 darms | AllGenBank+EMBL+DDBJ+PDB   | BLASTN     | <a href="#">gb L11235.1 PIGAPOLIP</a>    | Susscrofa apolipoprotein B gene, 3' ...                               |
| 366 | pl 3 D07 darmf | AllGenBank+EMBL+DDBJ+PDB   | BLASTN     | <a href="#">gb AF304203.1 AF304203</a>   | Susscrofa breed Swedish wild boar m...                                |
| 367 | pl 3 D09 darmf | AllGenBank+EMBL+DDBJ+PDB   | BLASTN     | <a href="#">gb L13068.1 PIGCABIPRO</a>   | SusScrofa calbindin D-9k mRNA, comp...                                |
| 368 | pl 3 E05 darms | AllGenBank+EMBL+DDBJ+PDB   | BLASTN     | <a href="#">gb AF089897.1 AF089897</a>   | Homosapiens topoisomerase-related f...                                |
| 369 | pl 3 E06 darms | AllGenBank+EMBL+DDBJ+PDB   | BLASTN     | <a href="#">gb L11235.1 PIGAPOLIP</a>    | Susscrofa apolipoprotein B gene, 3' ...                               |
| 370 | pl 3 E12 darms | AllGenBank+EMBL+DDBJ+PDB   | BLASTN     | <a href="#">gb AC092656.1</a>            | Homosapiens BAC clone RP11-455G16 from 4, c...                        |
| 371 | pl 3 F01 darms | AllGenBank+EMBL+DDBJ+PDB   | BLASTN     | <a href="#">gb L01083.1 RABUGT2BC</a>    | Oryctolagusuniculus UDP-glucuronosy...                                |
| 372 | pl 3 F04 darms | AllGenBank+EMBL+DDBJ+PDB   | BLASTN     | <a href="#">gb AC092656.1</a>            | Homosapiens BAC clone RP11-455G16 from 4, c...                        |
| 373 | pl 3 F05 darms | AllGenBank+EMBL+DDBJ+PDB   | BLASTN     | <a href="#">gb AY317138.1</a>            | Homosapiens CPS1 isoform mRNA, complete cds...                        |
| 374 | pl 3 F07 darms | AllGenBank+EMBL+DDBJ+PDB   | BLASTN     | <a href="#">ref NM_213850.1</a>          | Susscrofa glutathione S-transferase (LOC3...                          |
| 375 | pl 3 F08 darms | AllGenBank+EMBL+DDBJ+PDB   | BLASTN     | <a href="#">ref NM_214389.1</a>          | Susscrofa glutathione S-transferase (GSTA...                          |
| 376 | pl 3 F10 darms | DFCI Sus scrofa Gene Index | BLASTN     | <a href="#">pig TC221307</a>             | myosin alkali light chain 1 contig 19                                 |
| 377 | pl 3 F11 darms | AllGenBank+EMBL+DDBJ+PDB   | BLASTN     | <a href="#">ref NM_000134.2</a>          | Homosapiens fatty acid binding protein 2,...                          |
| 378 | pl 3 G04 darms | AllGenBank+EMBL+DDBJ+PDB   | BLASTN     | <a href="#">ref NM_000035.2</a>          | Homosapiens aldolase B, fructose-bisphosp...                          |
| 379 | pl 3 G05 darms | AllGenBank+EMBL+DDBJ+PDB   | BLASTN     | <a href="#">gb AK027115.1</a>            | Homosapiens cDNA: FLJ23462 fis, clone HSI0...                         |
| 380 | pl 3 G06 darms | AllGenBank+EMBL+DDBJ+PDB   | BLASTN     | <a href="#">ref NM_213850.1</a>          | Susscrofa glutathione S-transferase (LOC3...                          |
| 381 | pl 3 G09 darms | AllGenBank+EMBL+DDBJ+PDB   | BLASTN     | <a href="#">ref NM_214389.1</a>          | Susscrofa glutathione S-transferase (GSTA...                          |
| 382 | pl 3 G11 darms | AllGenBank+EMBL+DDBJ+PDB   | BLASTN     | <a href="#">ref NM_004863.2</a>          | Homosapiens serine palmitoyltransferase, ...                          |
| 383 | pl 3 G12 darms | AllGenBank+EMBL+DDBJ+PDB   | BLASTN     | <a href="#">ref NM_205787.1</a>          | Bostaurus pancreatic thread protein (PTP)...                          |
| 384 | pl 3 H02 darms | AllGenBank+EMBL+DDBJ+PDB   | BLASTN     | <a href="#">ref NM_001343.1</a>          | Homosapiens disabled homolog 2, mitogen-r...                          |
| 385 | pl 3 H02 darms | AllGenBank+EMBL+DDBJ+PDB   | BLASTN     | <a href="#">ref NM_214277.1</a>          | Susscrofa aminopeptidase N (ANPEP), mRNA                              |
| 386 | pl 3 H07 darms | AllGenBank+EMBL+DDBJ+PDB   | BLASTN     | <a href="#">emb X77640.1 SSLFABP</a>     | S.scrofamRNA for liver fatty acid bin...                              |
| 387 | pl 3 H10 darms | AllGenBank+EMBL+DDBJ+PDB   | BLASTN     | <a href="#">AJ496801</a>                 | Sus scrofa mRNA for methylmalonyl-CoA mutase (MUT gene)               |
| 388 | pl 4 A04 darmf | AllGenBank+EMBL+DDBJ+PDB   | BLASTN     | <a href="#">gb AC091755.3</a>            | Susscrofa clone RP44-123F10, complete sequence                        |
| 389 | pl 4 A04 darms | AllGenBank+EMBL+DDBJ+PDB   | BLASTN     | <a href="#">emb AJ251914.1 SSC251914</a> | Susscrofa MHC class I SLA genes, ...                                  |
| 390 | pl 4 A06 darmf | AllGenBank+EMBL+DDBJ+PDB   | BLASTN     | <a href="#">gb L11235.1 PIGAPOLIP</a>    | Susscrofa apolipoprotein B gene, 3' ...                               |
| 391 | pl 4 A06 darms | AllGenBank+EMBL+DDBJ+PDB   | BLASTN     | <a href="#">gb AY237534.1</a>            | Susscrofa isolate MG cytochrome b (cytb) ge...                        |
| 392 | pl 4 A11 darms | AllGenBank+EMBL+DDBJ+PDB   | BLASTN     | <a href="#">ref NM_001001259.1</a>       | Susscrofa enteropeptidase, light chain...                             |
| 393 | pl 4 A12 darmf | AllGenBank+EMBL+DDBJ+PDB   | BLASTN     | <a href="#">emb X52566.1 SSHAPTOC</a>    | PigmRNA for haptocorrin (partial)                                     |
| 394 | pl 4 B03 darmf | AllGenBank+EMBL+DDBJ+PDB   | BLASTN     | <a href="#">ref NM_207297.1</a>          | Homosapiens muscleblind-like (Drosophila)...                          |
| 395 | pl 4 B08 darmf | AllGenBank+EMBL+DDBJ+PDB   | BLASTN     | <a href="#">emb AJ293392.1 HSA293392</a> | Homosapiens mRNA differentially e...                                  |
| 396 | pl 4 B12 darms | AllGenBank+EMBL+DDBJ+PDB   | BLASTN     | <a href="#">gb AY208121.1</a>            | Susscrofa myostatin gene, complete cds                                |
| 397 | pl 4 C04 darmf | AllGenBank+EMBL+DDBJ+PDB   | BLASTN     | <a href="#">AK025296</a>                 | Homo sapiens cDNA: FLJ21643 fis, clone COL08382 (RNA-binding protein) |
| 398 | pl 4 C12 darms | AllGenBank+EMBL+DDBJ+PDB   | BLASTN     | <a href="#">ref NM_015384.3</a>          | Homosapiens Nipped-B homolog (Drosophila)...                          |
| 399 | pl 4 D04 darmf | AllGenBank+EMBL+DDBJ+PDB   | BLASTN     | <a href="#">ref NM_000134.2</a>          | Homosapiens fatty acid binding protein 2,...                          |
| 400 | pl 4 D05 darmf | AllGenBank+EMBL+DDBJ+PDB   | BLASTN     | <a href="#">emb X77640.1 SSLFABP</a>     | S.scrofamRNA for liver fatty acid bin...                              |
| 401 | pl 4 D06 darmf | AllGenBank+EMBL+DDBJ+PDB   | BLASTN     | <a href="#">ref NM_000978.2</a>          | Homosapiens ribosomal protein L23 (RPL23)...                          |
| 402 | pl 4 D08 darmf | AllGenBank+EMBL+DDBJ+PDB   | BLASTN     | <a href="#">gb AC096883.2</a>            | Susscrofa clone RP44-276G17, complete sequence                        |
| 403 | pl 4 D12 darmf | AllGenBank+EMBL+DDBJ+PDB   | BLASTN     | <a href="#">NM_018374</a>                | similar to Homo sapiens transmembrane protein 106B (TMEM106B), mRNA   |
| 404 | pl 4 E02 darmf | AllGenBank+EMBL+DDBJ+PDB   | BLASTN     | <a href="#">gb AY337045.1</a>            | Susscrofa breed Duroc mitochondrion, comple...                        |
| 405 | pl 4 E07 darmf | AllGenBank+EMBL+DDBJ+PDB   | BLASTN     | <a href="#">ref NM_005782.1</a>          | Homosapiens THO complex 4, mRNA                                       |
| 406 | pl 4 E11 darmf | AllGenBank+EMBL+DDBJ+PDB   | BLASTN     | <a href="#">gb AC009996.7 AC009996</a>   | Homosapiens chromosome 15 clone RP1...                                |
| 407 | pl 4 E12 darmf | AllGenBank+EMBL+DDBJ+PDB   | BLASTN     | <a href="#">gb AY452491.1</a>            | Sinipercahuatsi clone 4492 28S ribosomal R...                         |
| 408 | pl 4 F02 darmf | AllGenBank+EMBL+DDBJ+PDB   | BLASTN     | <a href="#">ref NM_000134.2</a>          | Homosapiens fatty acid binding protein 2,...                          |
| 409 | pl 4 F02 darms | AllGenBank+EMBL+DDBJ+PDB   | BLASTN     | <a href="#">emb AL773591.7</a>           | PigDNA sequence from clone XX-35B1, comple...                         |
| 410 | pl 4 F03 darmf | AllGenBank+EMBL+DDBJ+PDB   | BLASTN     | <a href="#">gb L13068.1 PIGCABIPRO</a>   | SusScrofa calbindin D-9k mRNA, comp...                                |

| no. | plate ID       | database                   | Blast_type | Genbank or TC acc.                       | Hit                                            |
|-----|----------------|----------------------------|------------|------------------------------------------|------------------------------------------------|
| 420 | pl 4 F04 darmf | AllGenBank+EMBL+DDBJ+PDB   | BLASTN     | <a href="#">ref NM_001743.3 </a>         | Homosapiens calmodulin 2 (phosphorylase k...   |
| 421 | pl 4 F06 darmf | AllGenBank+EMBL+DDBJ+PDB   | BLASTN     | <a href="#">gb AC007281.3 AC007281</a>   | Homosapiens BAC clone RP11-457F14 f...         |
| 422 | pl 4 F07 darmf | AllGenBank+EMBL+DDBJ+PDB   | BLASTN     | <a href="#">gb L13068.1 PIGCABIPRO</a>   | SusScrofa calbindin D-9k mRNA, comp...         |
| 423 | pl 4 F08 darmf | AllGenBank+EMBL+DDBJ+PDB   | BLASTN     | <a href="#">gb L13068.1 PIGCABIPRO</a>   | SusScrofa calbindin D-9k mRNA, comp...         |
| 424 | pl 4 F09 darmf | AllGenBank+EMBL+DDBJ+PDB   | BLASTN     | <a href="#">gb AY337045.1 </a>           | SusScrofa breed Duroc mitochondrion, comple... |
| 425 | pl 4 F10 darmf | AllGenBank+EMBL+DDBJ+PDB   | BLASTN     | <a href="#">gb AF034253.1 AF034253</a>   | SusScrofa mitochondrion, complete g...         |
| 426 | pl 4 F11 darmf | AllGenBank+EMBL+DDBJ+PDB   | BLASTN     | <a href="#">emb AJ293392.1 HSA293392</a> | Homosapiens mRNA differentially e...           |
| 427 | pl 4 F12 darmf | AllGenBank+EMBL+DDBJ+PDB   | BLASTN     | <a href="#">ref NM_000134.2 </a>         | Homosapiens fatty acid binding protein 2,...   |
| 428 | pl 4 G01 darmf | AllGenBank+EMBL+DDBJ+PDB   | BLASTN     | <a href="#">gb AC150879.3 </a>           | Bostaurus BAC CH240-491H11 (Children's Hos...  |
| 429 | pl 4 G04 darmf | AllGenBank+EMBL+DDBJ+PDB   | BLASTN     | <a href="#">gb BC005275.1 </a>           | Homosapiens I factor (complement), mRNA (cd... |
| 430 | pl 4 G05 darmf | AllGenBank+EMBL+DDBJ+PDB   | BLASTN     | <a href="#">gb AY011178.1 </a>           | SusScrofa 16S ribosomal RNA gene, partial s... |
| 431 | pl 4 G07 darmf | AllGenBank+EMBL+DDBJ+PDB   | BLASTN     | <a href="#">emb X77640.1 SSLFABP</a>     | S.scrofamRNA for liver fatty acid bin...       |
| 432 | pl 4 G11 darmn | AllGenBank+EMBL+DDBJ+PDB   | BLASTN     | <a href="#">ref NM_214423.1 </a>         | SusScrofa cytochrome P450 3A29 (CYP3A29),...   |
| 433 | pl 4 G12 darmf | DFCI Sus scrofa Gene Index | BLASTN     | <a href="#">pig BP165897</a>             | Unknown                                        |
| 434 | pl 4 G12 darmn | AllGenBank+EMBL+DDBJ+PDB   | BLASTN     | <a href="#">emb AL391646.12 </a>         | HumanDNA sequence from clone RP11-697G4 o...   |
| 435 | pl 4 H01 darmn | AllGenBank+EMBL+DDBJ+PDB   | BLASTN     | <a href="#">emb AJ293393.1 HSA293393</a> | Homosapiens mRNA differentially e...           |
| 436 | pl 4 H02 darmn | AllGenBank+EMBL+DDBJ+PDB   | BLASTN     | <a href="#">ref NM_214420.1 </a>         | SusScrofa cytochrome P450 2C49 (CYP2C49),...   |
| 437 | pl 4 H03 darmf | AllGenBank+EMBL+DDBJ+PDB   | BLASTN     | <a href="#">db AK021638.1 </a>           | Homosapiens cDNA FLJ11576 fis, clone HEMBA...  |
| 438 | pl 4 H07 darmf | AllGenBank+EMBL+DDBJ+PDB   | BLASTN     | <a href="#">ref NM_000134.2 </a>         | Homosapiens fatty acid binding protein 2,...   |
| 439 | pl 4 H09 darmf | DFCI Sus scrofa Gene Index | BLASTN     | <a href="#">pig TC271757</a>             | non-histone protein HMG1                       |
| 440 | pl 4 H10 darmf | AllGenBank+EMBL+DDBJ+PDB   | BLASTN     | <a href="#">emb AJ293392.1 HSA293392</a> | Homosapiens mRNA differentially e...           |
| 441 | pl 4 H11 darmf | AllGenBank+EMBL+DDBJ+PDB   | BLASTN     | <a href="#">gb AC017079.5 </a>           | Homosapiens BAC clone RP11-462M9 from 2, co... |
| 442 | pl 5 A01 darmf | AllGenBank+EMBL+DDBJ+PDB   | BLASTN     | <a href="#">ref NM_000134.2 </a>         | Homosapiens fatty acid binding protein 2,...   |
| 443 | pl 5 A01 darmn | AllGenBank+EMBL+DDBJ+PDB   | BLASTN     | <a href="#">gb L11235.1 PIGAPOLIP</a>    | SusScrofa apolipoprotein B gene, 3' ...        |
| 444 | pl 5 A04 darmf | AllGenBank+EMBL+DDBJ+PDB   | BLASTN     | <a href="#">db AK026416.1 </a>           | Homosapiens cDNA: FLJ22763 fis, clone KAIA...  |
| 445 | pl 5 A04 darmn | AllGenBank+EMBL+DDBJ+PDB   | BLASTN     | <a href="#">gb AC091507.2 </a>           | SusScrofa clone RP44-397B10, complete sequence |
| 446 | pl 5 A05 darmf | AllGenBank+EMBL+DDBJ+PDB   | BLASTN     | <a href="#">gb AY334492.1 </a>           | SusScrofa breed Jeju native black mitochond... |
| 447 | pl 5 A07 darmf | AllGenBank+EMBL+DDBJ+PDB   | BLASTN     | <a href="#">gb L13068.1 PIGCABIPRO</a>   | SusScrofa calbindin D-9k mRNA, comp...         |
| 448 | pl 5 A10 darmf | DFCI Sus scrofa Gene Index | BLASTN     | <a href="#">pig TC219401</a>             | cytochrome c oxidase subunit 3                 |
| 449 | pl 5 A11 darmn | AllGenBank+EMBL+DDBJ+PDB   | BLASTN     | <a href="#">gb AY358671.1 </a>           | Homosapiens clone DNA58855 TCCE518 (UNQ518)... |
| 450 | pl 5 A12 darmf | AllGenBank+EMBL+DDBJ+PDB   | BLASTN     | <a href="#">gb AY011178.1 </a>           | SusScrofa 16S ribosomal RNA gene, partial s... |
| 451 | pl 5 B03 darmn | AllGenBank+EMBL+DDBJ+PDB   | BLASTN     | <a href="#">gb AY237534.1 </a>           | SusScrofa isolate MG cytochrome b (cytb) ge... |
| 452 | pl 5 B04 darmn | AllGenBank+EMBL+DDBJ+PDB   | BLASTN     | <a href="#">ref NM_174239.2 </a>         | Bostaurus aldehyde dehydrogenase 1 family...   |
| 453 | pl 5 B05 darmn | AllGenBank+EMBL+DDBJ+PDB   | BLASTN     | <a href="#">gb AY011178.1 </a>           | SusScrofa 16S ribosomal RNA gene, partial s... |
| 454 | pl 5 C02 darmn | AllGenBank+EMBL+DDBJ+PDB   | BLASTN     | <a href="#">ref NM_214423.1 </a>         | SusScrofa cytochrome P450 3A29 (CYP3A29),...   |
| 455 | pl 5 C03 darmf | AllGenBank+EMBL+DDBJ+PDB   | BLASTN     | <a href="#">gb AY334492.1 </a>           | SusScrofa breed Jeju native black mitochond... |
| 456 | pl 5 C05 darmf | AllGenBank+EMBL+DDBJ+PDB   | BLASTN     | <a href="#">emb AJ293405.1 HSA293405</a> | Homosapiens mRNA differentially e...           |
| 457 | pl 5 C08 darmf | AllGenBank+EMBL+DDBJ+PDB   | BLASTN     | <a href="#">gb AY334492.1 </a>           | SusScrofa breed Jeju native black mitochond... |
| 458 | pl 5 C12 darmf | AllGenBank+EMBL+DDBJ+PDB   | BLASTN     | <a href="#">emb AJ251829.1 SSC251829</a> | SusScrofa MHC class I SLA genomic...           |
| 459 | pl 5 D01 darmn | AllGenBank+EMBL+DDBJ+PDB   | BLASTN     | <a href="#">gb AY293855.1 </a>           | Homosapiens insulin-like growth factor 2 re... |
| 460 | pl 5 D08 darmf | DFCI Sus scrofa Gene Index | BLASTN     | <a href="#">pig TC219401</a>             | cytochrome c oxidase subunit 3                 |
| 461 | pl 5 D10 darmf | AllGenBank+EMBL+DDBJ+PDB   | BLASTN     | <a href="#">emb X52566.1 SSHAPTOC</a>    | PigmRNA for haptocorrin (partial)              |
| 462 | pl 5 D12 darmf | AllGenBank+EMBL+DDBJ+PDB   | BLASTN     | <a href="#">gb AY011178.1 </a>           | SusScrofa 16S ribosomal RNA gene, partial s... |
| 463 | pl 5 E03 darmf | DFCI Sus scrofa Gene Index | BLASTN     | <a href="#">pig TC219434</a>             | cytochrome c oxidase subunit II                |
| 464 | pl 5 E03 darmn | AllGenBank+EMBL+DDBJ+PDB   | BLASTN     | <a href="#">gb AF016833.2 AF016833</a>   | Homosapiens maltase-glucoamylase mR...         |
| 465 | pl 5 E07 darmf | DFCI Sus scrofa Gene Index | BLASTN     | <a href="#">pig TC219401</a>             | cytochrome c oxidase subunit 3                 |

| no. | plate ID       | database                   | Blast_type | Genbank or TC acc.                     | Hit                                                                |
|-----|----------------|----------------------------|------------|----------------------------------------|--------------------------------------------------------------------|
| 466 | pl 5 E12 darmn | AllGenBank+EMBL+DDBJ+PDB   | BLASTN     | <a href="#">emb AJ620655.1 </a>        | Bostaurus mRNA for signal transducer and a...                      |
| 467 | pl 5 F01 darmf | AllGenBank+EMBL+DDBJ+PDB   | BLASTN     | <a href="#">gb AF034253.1 AF034253</a> | Susscrofa mitochondrion, complete g...                             |
| 468 | pl 5 F03 darmf | AllGenBank+EMBL+DDBJ+PDB   | BLASTN     | <a href="#">gb AY011178.1 </a>         | Susscrofa 16S ribosomal RNA gene, partial s...                     |
| 469 | pl 5 F04 darmf | AllGenBank+EMBL+DDBJ+PDB   | BLASTN     | <a href="#">gb AY686211.1 </a>         | Culicoidessonorensis gelsolin gene, partial...                     |
| 470 | pl 5 F07 darmf | DFCI Sus scrofa Gene Index | BLASTN     | <a href="#">pig CB483241</a>           | cytochrome b                                                       |
| 471 | pl 5 F10 darmf | AllGenBank+EMBL+DDBJ+PDB   | BLASTN     | <a href="#">gb L13068.1 PIGCABIPRO</a> | SusScrofa calbindin D-9k mRNA, comp...                             |
| 472 | pl 5 G01 darmn | AllGenBank+EMBL+DDBJ+PDB   | BLASTN     | <a href="#">gb AF304203.1 AF304203</a> | Susscrofa breed Swedish wild boar m...                             |
| 473 | pl 5 G02 darmn | AllGenBank+EMBL+DDBJ+PDB   | BLASTN     | <a href="#">gb AY334492.1 </a>         | Susscrofa breed Jeju native black mitochond...                     |
| 474 | pl 5 G06 darmf | AllGenBank+EMBL+DDBJ+PDB   | BLASTN     | <a href="#">ref NM_001041.1 </a>       | Homosapiens sucrase-isomaltase (alpha-glu...                       |
| 475 | pl 5 G11 darmn | AllGenBank+EMBL+DDBJ+PDB   | BLASTN     | <a href="#">ref NM_214420.1 </a>       | Susscrofa cytochrome P450 2C49 (CYP2C49),...                       |
| 476 | pl 5 G12 darmn | AllGenBank+EMBL+DDBJ+PDB   | BLASTN     | <a href="#">gb AC091185.6 </a>         | Homosapiens chromosome 8, clone RP11-395I14...                     |
| 477 | pl 5 H03 darmf | DFCI Sus scrofa Gene Index | BLASTN     | <a href="#">pig TC219401</a>           | cytochrome c oxidase subunit 3                                     |
| 478 | pl 5 H04 darmf | AllGenBank+EMBL+DDBJ+PDB   | BLASTN     | <a href="#">ref NG_002471.1 </a>       | Homosapiens ribosomal protein L9 pseudoge...                       |
| 479 | pl 5 H07 darmn | AllGenBank+EMBL+DDBJ+PDB   | BLASTN     | <a href="#">ref NM_214366.1 </a>       | Susscrofa protein phosphatase 2A alpha su...                       |
| 480 | pl 5 H12 darmn | AllGenBank+EMBL+DDBJ+PDB   | BLASTN     | <a href="#">gb L11235.1 PIGAPOLIP</a>  | Susscrofa apolipoprotein B gene, 3' ...                            |
| 481 | pl 6 A02 darmf | AllGenBank+EMBL+DDBJ+PDB   | BLASTN     | <a href="#">gb L13068.1 PIGCABIPRO</a> | SusScrofa calbindin D-9k mRNA, comp...                             |
| 482 | pl 6 A02 darmn | AllGenBank+EMBL+DDBJ+PDB   | BLASTN     | <a href="#">ref NM_214423.1 </a>       | Susscrofa cytochrome P450 3A29 (CYP3A29),...                       |
| 483 | pl 6 A03 darmf | AllGenBank+EMBL+DDBJ+PDB   | BLASTN     | <a href="#">gb AY337045.1 </a>         | Susscrofa breed Duroc mitochondrion, comple...                     |
| 484 | pl 6 A09 darmf | DFCI Sus scrofa Gene Index | BLASTN     | <a href="#">pig TC206576</a>           | FOAP-11 protein                                                    |
| 485 | pl 6 A12 darmn | AllGenBank+EMBL+DDBJ+PDB   | BLASTN     | <a href="#">gb BC000449.2 </a>         | Homosapiens ubiquitin C, mRNA (cDNA clone I...                     |
| 486 | pl 6 B01 darmn | AllGenBank+EMBL+DDBJ+PDB   | BLASTN     | <a href="#">NM_213987</a>              | Sus scrofa heparin binding protein (HBP15/L22)                     |
| 487 | pl 6 B04 darmn | AllGenBank+EMBL+DDBJ+PDB   | BLASTN     | <a href="#">AY609465.1</a>             | Sus scrofa clone Clu_12576.scr.msk.p1.Contig3                      |
| 488 | pl 6 B05 darmf | AllGenBank+EMBL+DDBJ+PDB   | BLASTN     | <a href="#">gb AF304203.1 AF304203</a> | Susscrofa breed Swedish wild boar m...                             |
| 489 | pl 6 B10 darmf | AllGenBank+EMBL+DDBJ+PDB   | BLASTN     | <a href="#">gb L13068.1 PIGCABIPRO</a> | SusScrofa calbindin D-9k mRNA, comp...                             |
| 490 | pl 6 B10 darmn | AllGenBank+EMBL+DDBJ+PDB   | BLASTN     | <a href="#">ref NM_214389.1 </a>       | Susscrofa glutathione S-transferase (GSTA...                       |
| 491 | pl 6 B11 darmf | AllGenBank+EMBL+DDBJ+PDB   | BLASTN     | <a href="#">ref NM_019010.1 </a>       | Homosapiens keratin 20 (KRT20), mRNA                               |
| 492 | pl 6 C02 darmn | AllGenBank+EMBL+DDBJ+PDB   | BLASTN     | <a href="#">dbj AK125207.1 </a>        | Homosapiens cDNA FLJ43217 fis, clone FEBRA...                      |
| 493 | pl 6 C03 darmf | DFCI Sus scrofa Gene Index | BLASTN     | <a href="#">pig TC219434</a>           | cytochrome c oxidase subunit II                                    |
| 494 | pl 6 C04 darmn | AllGenBank+EMBL+DDBJ+PDB   | BLASTN     | <a href="#">ref NM_019010.1 </a>       | Homosapiens keratin 20 (KRT20), mRNA                               |
| 495 | pl 6 C06 darmn | AllGenBank+EMBL+DDBJ+PDB   | BLASTN     | <a href="#">gb L13068.1 PIGCABIPRO</a> | SusScrofa calbindin D-9k mRNA, comp...                             |
| 496 | pl 6 D03 darmf | AllGenBank+EMBL+DDBJ+PDB   | BLASTN     | <a href="#">gb AY334492.1 </a>         | Susscrofa breed Jeju native black mitochond...                     |
| 497 | pl 6 D10 darmf | AllGenBank+EMBL+DDBJ+PDB   | BLASTN     | <a href="#">ref NM_003122.2 </a>       | Homosapiens serine protease inhibitor, Ka...                       |
| 498 | pl 6 D12 darmf | AllGenBank+EMBL+DDBJ+PDB   | BLASTN     | <a href="#">dbj AK026003.1 </a>        | Homosapiens cDNA: FLJ22350 fis, clone HRC0...                      |
| 499 | pl 6 E02 darmn | AllGenBank+EMBL+DDBJ+PDB   | BLASTN     | <a href="#">ref NM_214281.1 </a>       | Susscrofa complement regulator factor H (...)                      |
| 500 | pl 6 E03 darmn | AllGenBank+EMBL+DDBJ+PDB   | BLASTN     | <a href="#">gb M18159.1 PIGUBP</a>     | Piggpoly-ubiquitin mRNA, 3' end                                    |
| 501 | pl 6 E05 darmf | AllGenBank+EMBL+DDBJ+PDB   | BLASTN     | <a href="#">gb AF304203.1 AF304203</a> | Susscrofa breed Swedish wild boar m...                             |
| 502 | pl 6 F08 darmf | AllGenBank+EMBL+DDBJ+PDB   | BLASTN     | <a href="#">ref NM_173968.2 </a>       | Bostaurus thioredoxin (TXN), mRNA                                  |
| 503 | pl 6 F11 darmf | AllGenBank+EMBL+DDBJ+PDB   | BLASTN     | <a href="#">ref NM_003122.2 </a>       | Homosapiens serine protease inhibitor, Ka...                       |
| 504 | pl 6 G02 darmf | AllGenBank+EMBL+DDBJ+PDB   | BLASTN     | <a href="#">ref NM_002299.2 </a>       | Homosapiens lactase (LCT), mRNA                                    |
| 505 | pl 6 G03 darmf | AllGenBank+EMBL+DDBJ+PDB   | BLASTN     | <a href="#">ref NM_000134.2 </a>       | Homosapiens fatty acid binding protein 2,...                       |
| 506 | pl 6 G04 darmn | AllGenBank+EMBL+DDBJ+PDB   | BLASTN     | <a href="#">ref NM_015049.1 </a>       | Homo sapiens trafficking protein, kinesin binding 2 (TRAK2), mRNA. |
| 507 | pl 6 G05 darmn | AllGenBank+EMBL+DDBJ+PDB   | BLASTN     | <a href="#">emb Z93098.1 SSSSCC103</a> | S.scrofaCYP2C42 mRNA for cytochrome...                             |
| 508 | pl 6 G06 darmf | DFCI Sus scrofa Gene Index | BLASTN     | <a href="#">pig TC222777</a>           | immunoglobulin J chain                                             |
| 509 | pl 6 G07 darmf | AllGenBank+EMBL+DDBJ+PDB   | BLASTN     | <a href="#">DQ991395</a>               | Thioredoxin-interacting protein (TXNIP)                            |
| 510 | pl 6 G08 darmn | AllGenBank+EMBL+DDBJ+PDB   | BLASTN     | <a href="#">gb AC104482.2 </a>         | Susscrofa clone RP44-423C21, complete sequence                     |
| 511 | pl 6 H01 darmn | AllGenBank+EMBL+DDBJ+PDB   | BLASTN     | <a href="#">ref NM_205787.1 </a>       | Bostaurus pancreatic thread protein (PTP)...                       |

| no. | plate ID       | database                   | Blast_type | Genbank or TC acc.                       | Hit                                                             |
|-----|----------------|----------------------------|------------|------------------------------------------|-----------------------------------------------------------------|
| 512 | pl 6 H02 darmn | AllGenBank+EMBL+DDBJ+PDB   | BLASTN     | <a href="#">NM_002031</a>                | Homo sapiens fyn-related kinase (FRK).                          |
| 513 | pl 6 H03 darmn | AllGenBank+EMBL+DDBJ+PDB   | BLASTN     | <a href="#">ref NM_002031.2 </a>         | Homosapiens fyn-related kinase (FRK), mRNA                      |
| 514 | pl 6 H06 darmf | AllGenBank+EMBL+DDBJ+PDB   | BLASTN     | <a href="#">ref NM_000134.2 </a>         | Homosapiens fatty acid binding protein 2,...                    |
| 515 | pl 6 H08 darmf | DFCI Sus scrofa Gene Index | BLASTN     | <a href="#">pig TC221032</a>             | 60S ribosomal protein L34                                       |
| 516 | pl 6 H08 darmn | AllGenBank+EMBL+DDBJ+PDB   | BLASTN     | <a href="#">gb AC122176.2 </a>           | Homosapiens chromosome 3 clone RP11-294018,...                  |
| 517 | pl 6 H12 darmn | AllGenBank+EMBL+DDBJ+PDB   | BLASTN     | <a href="#">NM_001099668</a>             | Homo sapiens similar to HSPC010 (HIG1 domain family, member 1A) |
| 518 | pl 7 A03 darmn | AllGenBank+EMBL+DDBJ+PDB   | BLASTN     | <a href="#">gb AC092497.2 </a>           | Susscrofa clone RP44-30C22, complete sequence                   |
| 519 | pl 7 A04 darmf | AllGenBank+EMBL+DDBJ+PDB   | BLASTN     | <a href="#">gb L11235.1 PIGAPOLIP</a>    | Susscrofa apolipoprotein B gene, 3' ...                         |
| 520 | pl 7 A05 darmf | AllGenBank+EMBL+DDBJ+PDB   | BLASTN     | <a href="#">gb AY686211.1 </a>           | Culicoidessonorensis gelsolin gene, partial...                  |
| 521 | pl 7 A11 darmf | AllGenBank+EMBL+DDBJ+PDB   | BLASTN     | <a href="#">gb AY011178.1 </a>           | Susscrofa 16S ribosomal RNA gene, partial s...                  |
| 522 | pl 7 B05 darmf | AllGenBank+EMBL+DDBJ+PDB   | BLASTN     | <a href="#">gb AF304203.1 AF304203</a>   | Susscrofa breed Swedish wild boar m...                          |
| 523 | pl 7 B07 darmn | DFCI Sus scrofa Gene Index | BLASTN     | <a href="#">pig TC219401</a>             | cytochrome c oxidase subunit 3                                  |
| 524 | pl 7 B08 darmf | AllGenBank+EMBL+DDBJ+PDB   | BLASTN     | <a href="#">gb AF304203.1 AF304203</a>   | Susscrofa breed Swedish wild boar m...                          |
| 525 | pl 7 B09 darmf | AllGenBank+EMBL+DDBJ+PDB   | BLASTN     | <a href="#">gb AY334492.1 </a>           | Susscrofa breed Jeju native black mitochond...                  |
| 526 | pl 7 B10 darmn | AllGenBank+EMBL+DDBJ+PDB   | BLASTN     | <a href="#">ref NM_001001168.1 </a>      | Bostaurus cell division cycle 10 (CDC1...                       |
| 527 | pl 7 C01 darmf | AllGenBank+EMBL+DDBJ+PDB   | BLASTN     | <a href="#">dbj AK126719.1 </a>          | Homosapiens cDNA FLJ44765 fis, clone BRACE...                   |
| 528 | pl 7 C11 darmn | AllGenBank+EMBL+DDBJ+PDB   | BLASTN     | <a href="#">gb AY337045.1 </a>           | Susscrofa breed Duroc mitochondrion, comple...                  |
| 529 | pl 7 D01 darmf | AllGenBank+EMBL+DDBJ+PDB   | BLASTN     | <a href="#">gb AY011178.1 </a>           | Susscrofa 16S ribosomal RNA gene, partial s...                  |
| 530 | pl 7 D08 darmf | DFCI Sus scrofa Gene Index | BLASTN     | <a href="#">pig TC262280</a>             | immunoglobulin J chain                                          |
| 531 | pl 7 D08 darmn | AllGenBank+EMBL+DDBJ+PDB   | BLASTN     | <a href="#">gb AY334492.1 </a>           | Susscrofa breed Jeju native black mitochond...                  |
| 532 | pl 7 D09 darmf | AllGenBank+EMBL+DDBJ+PDB   | BLASTN     | <a href="#">ref NM_000134.2 </a>         | Homosapiens fatty acid binding protein 2,...                    |
| 533 | pl 7 D12 darmf | AllGenBank+EMBL+DDBJ+PDB   | BLASTN     | <a href="#">ref NM_003122.2 </a>         | Homosapiens serine protease inhibitor, Ka...                    |
| 534 | pl 7 E07 darmn | AllGenBank+EMBL+DDBJ+PDB   | BLASTN     | <a href="#">gb AY345130.1 </a>           | Bostaurus carcinoembryonic antigen-related ...                  |
| 535 | pl 7 E10 darmf | AllGenBank+EMBL+DDBJ+PDB   | BLASTN     | <a href="#">emb X77640.1 SSLFABP</a>     | S.scrofamRNA for liver fatty acid bin...                        |
| 536 | pl 7 F02 darmn | DFCI Sus scrofa Gene Index | BLASTN     | <a href="#">pig TC239708</a>             | cytochrome oxidase subunit III [Sus scrofa]                     |
| 537 | pl 7 F08 darmf | DFCI Sus scrofa Gene Index | BLASTN     | <a href="#">pig TC219434</a>             | cytochrome c oxidase subunit II                                 |
| 538 | pl 7 F09 darmf | AllGenBank+EMBL+DDBJ+PDB   | BLASTN     | <a href="#">gb AY334492.1 </a>           | Susscrofa breed Jeju native black mitochond...                  |
| 539 | pl 7 F09 darmn | AllGenBank+EMBL+DDBJ+PDB   | BLASTN     | <a href="#">NM_205809</a>                | Bos taurus mucus-type core 2 beta-1,6...                        |
| 540 | pl 7 F12 darmn | AllGenBank+EMBL+DDBJ+PDB   | BLASTN     | <a href="#">gb AY337045.1 </a>           | Susscrofa breed Duroc mitochondrion, comple...                  |
| 541 | pl 7 G03 darmn | AllGenBank+EMBL+DDBJ+PDB   | BLASTN     | <a href="#">emb AJ293397.1 HSA293397</a> | Homosapiens mRNA differentially e...                            |
| 542 | pl 7 G09 darmf | AllGenBank+EMBL+DDBJ+PDB   | BLASTN     | <a href="#">gb AF304203.1 AF304203</a>   | Susscrofa breed Swedish wild boar m...                          |
| 543 | pl 7 G09 darmn | AllGenBank+EMBL+DDBJ+PDB   | BLASTN     | <a href="#">ref NM_000134.2 </a>         | Homosapiens fatty acid binding protein 2,...                    |
| 544 | pl 7 G11 darmf | DFCI Sus scrofa Gene Index | BLASTN     | <a href="#">pig TC219401</a>             | <a href="#">pig TC219401</a>                                    |
| 545 | pl 7 H01 darmf | AllGenBank+EMBL+DDBJ+PDB   | BLASTN     | <a href="#">gb L11235.1 PIGAPOLIP</a>    | Susscrofa apolipoprotein B gene, 3' ...                         |
| 546 | pl 7 H02 darmf | DFCI Sus scrofa Gene Index | BLASTN     | <a href="#">pig TC219401</a>             | cytochrome c oxidase subunit 3                                  |
| 547 | pl 7 H05 darmf | DFCI Sus scrofa Gene Index | BLASTN     | <a href="#">pig TC219401</a>             | cytochrome c oxidase subunit 3                                  |
| 548 | pl 7 H07 darmn | AllGenBank+EMBL+DDBJ+PDB   | BLASTN     | <a href="#">gb L11235.1 PIGAPOLIP</a>    | Susscrofa apolipoprotein B gene, 3' ...                         |
| 549 | pl 7 H08 darmn | AllGenBank+EMBL+DDBJ+PDB   | BLASTN     | <a href="#">gb AF304203.1 AF304203</a>   | Susscrofa breed Swedish wild boar m...                          |
| 550 | pl 8 A11 darmf | AllGenBank+EMBL+DDBJ+PDB   | BLASTN     | <a href="#">gb L13068.1 PIGCABIPRO</a>   | SusScrofa calbindin D-9k mRNA, comp...                          |
| 551 | pl 8 B03 darmf | DFCI Sus scrofa Gene Index | BLASTN     | <a href="#">pig TC219401</a>             | cytochrome c oxidase subunit 3                                  |
| 552 | pl 8 B06 darmf | DFCI Sus scrofa Gene Index | BLASTN     | <a href="#">pig TC219401</a>             | cytochrome c oxidase subunit 3                                  |
| 553 | pl 8 B07 darmf | AllGenBank+EMBL+DDBJ+PDB   | BLASTN     | <a href="#">gb M34044.1 PIGSGLT1A</a>    | PigNa+/glucose cotransporter protein...                         |
| 554 | pl 8 C02 darmf | AllGenBank+EMBL+DDBJ+PDB   | BLASTN     | <a href="#">emb AJ293397.1 HSA293397</a> | Homosapiens mRNA differentially e...                            |
| 555 | pl 8 C03 darmf | AllGenBank+EMBL+DDBJ+PDB   | BLASTN     | <a href="#">ref NM_214353.1 </a>         | Susscrofa peptidyl-prolyl cis-trans isome...                    |
| 556 | pl 8 C06 darmn | AllGenBank+EMBL+DDBJ+PDB   | BLASTN     | <a href="#">gb AY345127.1 </a>           | Bostaurus carcinoembryonic antigen-related ...                  |
| 557 | pl 8 C11 darmf | AllGenBank+EMBL+DDBJ+PDB   | BLASTN     | <a href="#">emb X77640.1 SSLFABP</a>     | S.scrofamRNA for liver fatty acid bin...                        |



| no. | plate ID       | EST (Genbank acc.) | library | Hit (Genbank acc.) | EST homologue to Hit                                                |
|-----|----------------|--------------------|---------|--------------------|---------------------------------------------------------------------|
| 1   | pl 1 A01 marc1 | AW346570           | Marc-1  | AJ293581           | Sus scrofa mRNA for oligosaccharyltransferase OST48                 |
| 2   | pl 1 A01 marc2 | AW315246           | Marc-2  | AJ295142           | Homo sapiens mRNA for C1q receptor protein                          |
| 3   | pl 1 A02 marc1 | AW786122           | Marc-1  | AY152815           | Homo sapiens GM3 synthase (SIAT9) mRNA                              |
| 4   | pl 1 A02 marc2 | AW431630           | Marc-2  | BC008817           | Homo Sapiens udp-n-acetylglucosamine--dolichyl-phosphate n-         |
| 5   | pl 1 A03 marc1 | BE014313           | Marc-1  | D84454             | Human mRNA for UDP-galactose translocator                           |
| 6   | pl 1 A03 marc2 | BF079992           | Marc-2  | AJ005382           | Homo sapiens beta-1,4-galactosyltransferase VII                     |
| 7   | pl 1 A04 marc1 | BE234997           | Marc-1  | AF458030           | Homo sapiens mutant I beta-1,6-N-acetylglucosaminyltransferase C    |
| 8   | pl 1 A04 marc2 | BF189726           | Marc-2  | AJ29358            | Sus scrofa mRNA for oligosaccharyltransferase OST48                 |
| 9   | pl 1 A05 marc1 | BG609836           | Marc-1  | NM_001478          | Homo sapiens UDP-N-acetyl-alpha-D-galactosamine:(N-                 |
| 10  | pl 1 A05 marc2 | BF440710           | Marc-2  | Y09022             | Homo sapiens, Not56                                                 |
| 11  | pl 1 A06 marc1 | BG834460           | Marc-1  | BC028337           | Homo sapiens glucosidase I, mRNA                                    |
| 12  | pl 1 A06 marc2 | BF441554           | Marc-2  | XM_001499600       | PREDICTED: Equus caballus similar to protein xylosyltransferase     |
| 13  | pl 1 A07 marc1 | BI337878           | Marc-1  | BC001462           | Homo sapiens, protease, serine, 8 (prostasin),                      |
| 14  | pl 1 A07 marc2 | BI342077           | Marc-2  | M83651             | Homo sapiens beta-1,4 n-acetylglactosaminyltransferase              |
| 15  | pl 1 A08 marc2 | BI360685           | Marc-1  | AY374470           | Sus scrofa electron transfer flavoprotein beta subunit precursor    |
| 16  | pl 1 B01 marc1 | AW346706           | Marc-2  | NM_001045944       | Bos taurus cysteinyl-tRNA synthetase 2, mRNA                        |
| 17  | pl 1 B01 marc2 | AW347661           | Marc-1  | U70881             | Sus scrofa alpha(1,2)fucosyltransferase (FUT2) gene                 |
| 18  | pl 1 B02 marc1 | AW670629           | Marc-2  | AK057194           | Homo sapiens highly similar to ALPHA-1,3-MANNOSYL-                  |
| 19  | pl 1 B02 marc2 | AW437110           | Marc-1  | AB009598           | Homo sapiens, beta-1,3-glucuronyltransferase 3                      |
| 20  | pl 1 B03 marc1 | BE014739           | Marc-2  | AB073740           | Homo sapiens beta-1,3-N-acetylglucosaminyltransferase 6, mRNA       |
| 21  | pl 1 B03 marc2 | BF080278           | Marc-1  | AB029396           | Homo sapiens, beta-1,3-glucuronyltransferase 1                      |
| 22  | pl 1 B04 marc1 | BE234739           | Marc-2  | AY277592           | Homo sapiens beta galactosyltransferase (BGALT15) mRNA              |
| 23  | pl 1 B04 marc2 | BF191063           | Marc-1  | M83651             | Human beta-1,4 N-acetylglactosaminyltransferase                     |
| 24  | pl 1 B05 marc1 | BG609690           | Marc-2  | AF028807           | Sus scrofa K-CI cotransporter mRNA                                  |
| 25  | pl 1 B05 marc2 | BF441019           | Marc-1  | BC000733           | Homo sapiens, eukaryotic translation initiation factor 3, subunit 4 |
| 26  | pl 1 B06 marc1 | BG834552           | Marc-2  | AB004550           | Homo sapiens mRNA for beta-1,4-galactosyltransferase                |
| 27  | pl 1 B06 marc2 | BF444493           | Marc-1  | NM_214405          | Sus scrofa methylmalonyl Coenzyme A mutase (MUT), nuclear gene      |
| 28  | pl 1 B07 marc1 | BI338260           | Marc-2  | BC006099           | Homo sapiens, UDP-Gal:betaGlcNAc beta 1,4- galactosyltransferase,   |
| 29  | pl 1 B07 marc2 | BI341949           | Marc-1  | AJ005382           | Homo sapiens, xylosylprotein beta1,4-galactosyltransferase          |
| 30  | pl 1 B08 marc2 | BI467570           | Marc-2  | BT021758           | Bos taurus farnesyltransferase, CAAX box, beta (FNTB), mRNA         |
| 31  | pl 1 C01 marc1 | AW483419           | Marc-1  | BC033586           | Homo sapiens, CD5 antigen-like (scavenger receptor cysteine rich    |
| 32  | pl 1 C01 marc2 | AW326318           | Marc-2  | AF261655           | Homo sapiens 1,2-alpha-mannosidase IC mRNA, complete cds.           |
| 33  | pl 1 C02 marc1 | BE012470           | Marc-1  | BC007906           | Homo sapiens, beta-1,3-glucuronyltransferase 3                      |
| 34  | pl 1 C02 marc2 | AW431415           | Marc-2  | AB015630           | Homo sapiens mRNA for beta-1,3-N-acetylglucosaminyltransferase      |
| 35  | pl 1 C03 marc1 | BE031094           | Marc-1  | L23768             | Human Gal beta1,3(4)GlcNAc alpha2,3-sialyltransferase mRNA          |
| 36  | pl 1 C03 marc2 | BF078234           | Marc-2  | L23768             | Human Gal beta1,3(4)GlcNAc alpha2,3-sialyltransferase mRNA          |
| 37  | pl 1 C04 marc1 | BE235974           | Marc-1  | L41680             | Homo sapiens alpha-2,8-polysialyltransferase (PST) gene             |
| 38  | pl 1 C04 marc2 | BF191469           | Marc-2  | Y09022             | Homo sapiens, Not56 (D. melanogaster)-like protein                  |

| no. | plate ID       | EST acc. |        | Genbank acc. | EST homologue to Hit                                                |
|-----|----------------|----------|--------|--------------|---------------------------------------------------------------------|
| 39  | pl 1 C05 marc1 | BG609695 | Marc-1 | NM_006927    | Homo sapiens sialyltransferase 4B (beta-galactoside alpha-2,3-      |
| 40  | pl 1 C05 marc2 | BF441737 | Marc-2 | AF038664     | Homo sapiens UDP-Gal:glucosylceramide beta-1,4-                     |
| 41  | pl 1 C06 marc1 | BG834582 | Marc-1 | U78539       | Mus musculus hereditary multiple exostoses (Ext1) mRNA              |
| 42  | pl 1 C06 marc2 | BF444451 | Marc-2 | Y15061       | Homo sapiens mRNA for GalT4 protein                                 |
| 43  | pl 1 C07 marc1 | BI338942 | Marc-1 | AF465338     | Bos taurus core 2 beta-1,6-N-acetylglucosaminyltransferase (C2GnT-  |
| 44  | pl 1 C07 marc2 | BI342835 | Marc-2 | U42408       | Human ladinin (LAD) mRNA, complete cds                              |
| 45  | pl 1 D01 marc1 | AW414818 | Marc-1 | AF125175     | Homo sapiens angiopoietin-related protein-2 mRNA                    |
| 46  | pl 1 D01 marc2 | AW347429 | Marc-2 | AB054999     | Mus musculus Npt1lc mRNA for type 1lc Na+/Pi-cotransporter,         |
| 47  | pl 1 D02 marc1 | AW785442 | Marc-1 | NM_005218    | Homo sapiens defensin, beta 1 (DEFB1), mRNA                         |
| 48  | pl 1 D02 marc2 | AW431590 | Marc-2 | AB004550     | Homo sapiens mRNA for beta-1,4-galactosyltransferase                |
| 49  | pl 1 D03 marc1 | BE030756 | Marc-1 | BT021618     | Bos taurus N-acetylgalactosaminidase, alpha- (NAGA), mRNA           |
| 50  | pl 1 D03 marc2 | BF080490 | Marc-2 | AB027296     | Sus scrofa mRNA for interleukin-1 beta converting enzyme            |
| 51  | pl 1 D04 marc1 | BE236051 | Marc-1 | M55575.      | Human branched chain alpha-keto acid dehydrogenase (BCKDHB)         |
| 52  | pl 1 D04 marc2 | BF192264 | Marc-2 | AF066859     | Homo sapiens muscle glycogen phosphorylase                          |
| 53  | pl 1 D05 marc1 | BG610457 | Marc-1 | BC055851     | Mus musculus O-linked N-acetylglucosamine (GlcNAc) transferase      |
| 54  | pl 1 D05 marc2 | BF442371 | Marc-2 | AY082802     | Equus caballus laminin 5 gamma 2 subunit mRNA                       |
| 55  | pl 1 D06 marc1 | BG834589 | Marc-1 | AAB67981     | tenascin X [Homo sapiens].                                          |
| 56  | pl 1 D06 marc2 | BI340284 | Marc-2 | BC013566     | Homo sapiens, aquaporin 3                                           |
| 57  | pl 1 D07 marc1 | AW312366 | Marc-1 | BC038711     | Homo sapiens, UDP-glucose ceramide glucosyltransferase              |
| 58  | pl 1 D07 marc2 | BI343035 | Marc-2 | AB050146     | Hippopotamus amphibius hippo91                                      |
| 59  | pl 1 E01 marc1 | AW435663 | Marc-1 | U20362       | Human Tg737 mRNA                                                    |
| 60  | pl 1 E01 marc2 | AW416038 | Marc-2 | D85389       | Homo sapiens mRNA for KIAA1918 protein / N-acetylglucosaminyl       |
| 61  | pl 1 E02 marc1 | BE014259 | Marc-1 | AM235753     | Canis familiaris mRNA for beta-1,3-galactosyltransferase 6 (b3galt6 |
| 62  | pl 1 E02 marc2 | BF075483 | Marc-2 | AF019386     | Homo sapiens heparan sulfate 3-O-sulfotransferase-1 precursor       |
| 63  | pl 1 E03 marc1 | BE031946 | Marc-1 | BC007317     | Homo sapiens, xylosylprotein beta1,4-galactosyltransferase,         |
| 64  | pl 1 E03 marc2 | BF080415 | Marc-2 | S55985       | Homo sapiens UDP-glucuronosyltransferase 2                          |
| 65  | pl 1 E04 marc1 | BG609072 | Marc-1 | NM_213784.   | Sus scrofa beta-galactosamide alpha-2,6-sialyltransferase (SIAT7B), |
| 66  | pl 1 E04 marc2 | BE032094 | Marc-2 | U70138       | Bos taurus Na-K-Cl cotransporter mRNA                               |
| 67  | pl 1 E05 marc1 | BG610354 | Marc-1 | AF044414     | Homo sapiens alpha mannosidase 6A8B (6a8b) mRNA                     |
| 68  | pl 1 E05 marc2 | BF443807 | Marc-2 | CAC82373.    | beta 1,3-galactosyltransferase [Homo sapiens].                      |
| 69  | pl 1 E06 marc1 | BG894654 | Marc-1 | AY126341     | Homo sapiens poly (ADP-ribose) polymerase 3 (PARP3) mRNA            |
| 70  | pl 1 E06 marc2 | BI340223 | Marc-2 | AB040672     | Homo sapiens GalNAc-T9 mRNA for UDP-GalNAc:polypeptide              |
| 71  | pl 1 E07 marc2 | BI343061 | Marc-2 | AF322917     | PIG (Q8WNQ7) N-acetylgalactosamine-6-sulfatase                      |
| 72  | pl 1 F01 marc1 | AW485787 | Marc-1 | 1            | Homo sapiens, serum/glucocorticoid regulated kinase                 |
| 73  | pl 1 F01 marc2 | AW482419 | Marc-2 | AF171665     | Bos taurus acidic alpha-glucosidase                                 |
| 74  | pl 1 F02 marc1 | AW785683 | Marc-1 | L36152.      | PIG (P50127) N-acetyllactosaminide alpha-1 3-galactosyltransferase  |
| 75  | pl 1 F02 marc2 | BF079231 | Marc-2 | X80502       | Homo sapiens Sia alpha2,3Galbeta1,4GlcNAcalpha,2,8-                 |
| 76  | pl 1 F03 marc1 | BE032367 | Marc-1 | AF142675     | Homo sapiens beta-1,4-galactosyltransferase VII mRNA                |
| 77  | pl 1 F03 marc2 | BF188840 | Marc-2 | AJ318957     | Homo sapiens, exostoses (multiple) 1                                |
| 78  | pl 1 F04 marc1 | BG609157 | Marc-1 | AB024435     | Homo sapiens mRNA for beta-1,4-galactosyltransferase III            |
| 79  | pl 1 F04 marc2 | BF192956 | Marc-2 | Z82022       | Homo sapiens, dolichyl-phosphate (UDP-N-acetylglucosamine) N-       |
| 80  | pl 1 F05 marc1 | BG610560 | Marc-1 | AF136897     | Sus scrofa alpha-1,2-fucosyltransferase (FUT2) gene, 5'UTR          |
| 81  | pl 1 F05 marc2 | BF444214 | Marc-2 | AC091297     | Sus scrofa clone RP44-52N13, complete sequence                      |
| 82  | pl 1 F06 marc1 | BG894913 | Marc-1 | BC010645     | Homo sapiens, Similar to sialyltransferase 4C (beta-galactosidase   |
| 83  | pl 1 F06 marc2 | BI340503 | Marc-2 | AF113537     | Homo sapiens P19 protein mRNA, complete cds                         |
| 84  | pl 1 F07 marc2 | BI359705 | Marc-2 | X00737       | Homo sapiens purine nucleoside phosphorylase                        |

| no. | plate ID       | EST acc. |        | Genbank acc.   | EST homologue to Hit                                                |
|-----|----------------|----------|--------|----------------|---------------------------------------------------------------------|
| 85  | pl 1 G01 marc1 | AW486241 | Marc-1 | NM_148176      | Homo sapiens peptidylprolyl isomerase (cyclophilin)-like 2 (PPIL2), |
| 86  | pl 1 G01 marc2 | AW435931 | Marc-2 | AF171665       | Bos taurus acidic alpha-glucosidase                                 |
| 87  | pl 1 G02 marc1 | BE014537 | Marc-1 | AF374414       | Sus scrofa hydroxysteroid 11-beta dehydrogenase 2 mRNA              |
| 88  | pl 1 G02 marc2 | BF079098 | Marc-2 | U59269         | Homo sapiens hyaluronan synthase 3 (HAS3)                           |
| 89  | pl 1 G03 marc1 | BE232663 | Marc-1 | AJ293582       | Sus scrofa mRNA for ribophorin I                                    |
| 90  | pl 1 G03 marc2 | BF188905 | Marc-2 | AJ318957       | Homo sapiens, exostoses (multiple) 1                                |
| 91  | pl 1 G04 marc1 | BG609427 | Marc-1 | AJ866725.      | Canis familiaris mRNA for protein xylosyltransferase (xt-II gene)   |
| 92  | pl 1 G04 marc2 | BF193488 | Marc-2 | D88146         | Homo sapiens mRNA for UDP-galactose transporter 2                   |
| 93  | pl 1 G05 marc1 | BG833738 | Marc-1 | AF126964       | Homo sapiens C3HC4-type zinc finger protein (LZK1) mRNA             |
| 94  | pl 1 G05 marc2 | BF444166 | Marc-2 | L23768         | Human Gal beta1,3(4)GlcNAc alpha2,3-sialyltransferase mRNA          |
| 95  | pl 1 G06 marc1 | BG895883 | Marc-1 | AB182374.      | Sus scrofa DNA, TCR-alpha/delta chain genes, clone: 0746B06.        |
| 96  | pl 1 G06 marc2 | BI341434 | Marc-2 | X14085         | Bovine galactosyltransferase mRNA                                   |
| 97  | pl 1 G07 marc2 | BI360149 | Marc-2 | AB000616       | homologue to UP Q9UM21_HUMAN (Q9UM21) UDP-GlcNAc:a-1 3-D-           |
| 98  | pl 1 H01 marc1 | AW786058 | Marc-1 | U70882         | Sus scrofa alpha(1,2)fucosyltransferase (FUT2a) pseudogene          |
| 99  | pl 1 H01 marc2 | AW436376 | Marc-2 | M97753         | Sus scrofa gal beta-1,3 GalNAc alpha-2,3 sialyltransferase          |
| 100 | pl 1 H02 marc1 | BE014560 | Marc-1 | AF105365       | Homo sapiens K-CI cotransporter KCC4 mRNA                           |
| 101 | pl 1 H02 marc2 | BF079574 | Marc-2 | AJ007583       | Homo sapiens mRNA for acetylglucosaminyltransferase-like protein    |
| 102 | pl 1 H03 marc1 | BE030639 | Marc-1 | NM_001098593.1 | Sus scrofa Rab geranylgeranyltransferase, alpha subunit             |
| 103 | pl 1 H03 marc2 | BF189470 | Marc-2 | AY116646       | Homo sapiens polymerase (DNA directed), delta 2, regulatory subunit |
| 104 | pl 1 H04 marc1 | BG609727 | Marc-1 | NM_001015534.1 | Bos taurus UDP-N-acetyl-alpha-D-galactosamine:polypeptide N-        |
| 105 | pl 1 H04 marc2 | BF199007 | Marc-2 | AJ293583       | Sus scrofa ribophorin II gene                                       |
| 106 | pl 1 H05 marc1 | BG834320 | Marc-1 | AF236864       | Canis familiaris laminin-5 gamma 2 mRNA, partial cds                |
| 107 | pl 1 H05 marc2 | BF444493 | Marc-2 | AC091297       | Sus scrofa clone RP44-52N13, complete sequence                      |
| 108 | pl 1 H06 marc1 | BI337733 | Marc-1 | AF458024       | Homo sapiens I beta-1,6-N-acetylglucosaminyltransferase A form      |
| 109 | pl 1 H06 marc2 | BI342048 | Marc-2 | NM_001046303   | Bos taurus RELT-like 2 (RELL2), mRNA                                |
| 110 | pl 1 H07 marc2 | BI360678 | Marc-2 | Y12509         | Homo sapiens, UDP-Gal:betaGlcNAc beta 1,4- galactosyltransferase,   |
